# Supplementary material
Source: PubMed Central journal article supplement (PMC6003411)

# Copper-Catalyzed Chan–Lam Cyclopropylation of Phenols and Azaheterocycles

Joseph Derosa<sup>††</sup>, Miriam L. O’Duill<sup>††</sup>, Matthew Holcomb<sup>†</sup>, Mark N. Boulous<sup>†</sup>, Ryan L. Patman<sup>§</sup>, Fen Wang<sup>§</sup>, Michelle Tran-Dubé<sup>§</sup>, Indrawan McAlpine<sup>§\*</sup> and Keary M. Engle<sup>†\*</sup>

\* indrawan.mcalpine@pfizer.com; keary@scripps.edu

<sup>†</sup>Department of Chemistry, The Scripps Research Institute, 10550 North Torrey Pines Road, La Jolla, California 92037, United States

<sup>§</sup> Pfizer Oncology Medicinal Chemistry, 10770 Science Center Drive, San Diego, California 92121, United States

## SUPPORTING INFORMATION

### Table of Contents

|                                               |      |
|-----------------------------------------------|------|
| General Information.....                      | S-2  |
| Experimental Procedures.....                  | S-2  |
| Photographic Depiction of Reaction Setup..... | S-2  |
| MMP Data.....                                 | S-3  |
| X-ray Crystallography.....                    | S-4  |
| NMR Spectra.....                              | S-10 |

## EXPERIMENTAL PROCEDURES

### *Photographic Depiction of Reaction Setup*

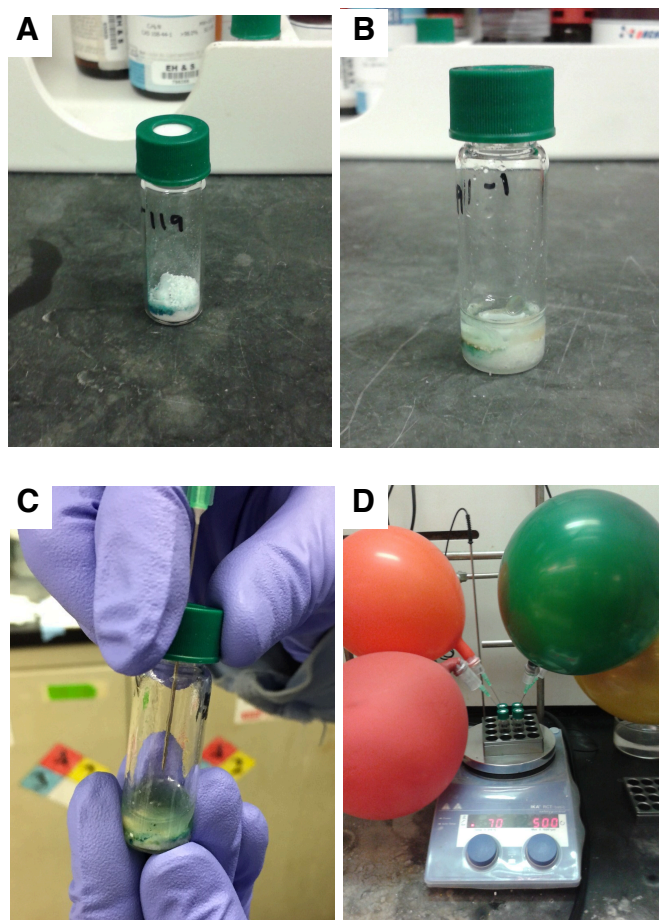

**Figure S1.** Photographic depiction of reaction setup detailed in general procedure. (A) Addition of stir bar and solid reagents. (B) Addition of solvents. (C) Purging with O<sub>2</sub> by loosening septum cap. (D) Reactions running on stir plate.

# MMP DATA

Table S1. Matched molecular pair (MMP) data from Pfizer database.

| Entry | Transforms                                                                                                  | HLM CL <sub>int,u</sub> <sup>a</sup><br>[mL/min/kg] | HLM CL <sub>int,u</sub> <sup>b</sup><br>[mL/min/kg] | HLM CL <sub>int,u</sub> <sup>c</sup><br>%D/S/I <sup>c</sup> |
|-------|-------------------------------------------------------------------------------------------------------------|-----------------------------------------------------|-----------------------------------------------------|-------------------------------------------------------------|
| (1)   | 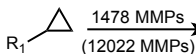 1478 MMPs<br>(12022 MMPs) | 12.8                                                | 53.2                                                | 18/76/6                                                     |
| (2)   |  579 MMPs<br>(5690 MMPs)   | 17.4                                                | 47.9                                                | 23/74/3                                                     |
| (3)   |  632 MMPs<br>(5840 MMPs)   | 33.5                                                | 63.2                                                | 42/55/3                                                     |
| (4)   |  495 MMPs<br>(4654 MMPs)   | 42.4                                                | 77.0                                                | 48/46/6                                                     |
| (5)   |  1752 MMPs<br>(13281 MMPs) | 0.61                                                | 46.2                                                | 10/82/8                                                     |
| (6)   |  2671 MMPs<br>(19478 MMPs) | -20.2                                               | 60.0                                                | 5/65/30                                                     |
| ----- |                                                                                                             |                                                     |                                                     |                                                             |
| (7)   |  38 MMPs<br>(173 MMPs)     | 25.8                                                | 71.3                                                | 32/63/5                                                     |
| (8)   |  14 MMPs<br>(69 MMPs)      | 23.9                                                | 28.6                                                | 57/43/0                                                     |
| (9)   |  8 MMPs<br>(37 MMPs)     | 11.2                                                | 43.6                                                | 38/50/12                                                    |
| (10)  |  2 MMPs<br>(8 MMPs)      | 5.1                                                 | 7.2                                                 | 50/50/0                                                     |
| (11)  |  49 MMPs<br>(177 MMPs)   | 0.24                                                | 52.7                                                | 12/76/12                                                    |
| (12)  |  42 MMPs<br>(146 MMPs)   | -4.49                                               | 64.5                                                | 14/55/31                                                    |
| ----- |                                                                                                             |                                                     |                                                     |                                                             |
| (13)  |  78 MMPs<br>(1154 MMPs)  | 16.3                                                | 59.3                                                | 26/64/10                                                    |
| (14)  |  46 MMPs<br>(580 MMPs)   | 32.4                                                | 62.4                                                | 35/61/4                                                     |
| (15)  |  60 MMPs<br>(980 MMPs)   | 38.9                                                | 68.0                                                | 35/63/2                                                     |
| (16)  |  51 MMPs<br>(637 MMPs)   | 31.9                                                | 62.5                                                | 45/51/4                                                     |
| (17)  |  98 MMPs<br>(1022 MMPs)  | 25.6                                                | 65.7                                                | 25/66/9                                                     |
| (18)  |  74 MMPs<br>(1013 MMPs)  | -17.0                                               | 65.7                                                | 11/49/40                                                    |

<sup>a</sup> Number above arrow corresponds to matched molecular pairs (MMPs) with HLM data.

Number in parentheses corresponds to total MMPs for that transform. <sup>b</sup>  $\mu$  = mean change.

<sup>c</sup> s = standard deviation. <sup>d</sup> %D/S/I = %decrease/%same/%increase ( $\pm 20$ ) in microsomal stability.

## X-RAY CRYSTALLOGRAPHY

### Experimental Summary

The single crystal X-ray diffraction studies were carried out on a Bruker APEX II Ultra CCD diffractometer equipped with Mo K<sub>α</sub> radiation ( $\lambda = 0.71073$ ). Crystals of the subject compound were used as received (grown from CDCl<sub>3</sub>). A 0.250 x 0.240 x 0.200 mm colorless block was mounted on a Cryoloop with Paratone oil.

Data were collected in a nitrogen gas stream at 100(2) K using  $\phi$  and  $\psi$  scans. Crystal-to-detector distance was 40 mm using exposure time 1s with a scan width of 0.80°. Data collection was 99.9% complete to 25.242° in  $q$ . A total of 10049 reflections were collected covering the indices,  $-10 \leq h \leq 10$ ,  $-10 \leq k \leq 10$ ,  $-15 \leq l \leq 15$ . 1913 reflections were found to be symmetry independent, with a  $R_{\text{int}}$  of 0.0479. Indexing and unit cell refinement indicated a **Primitive, Monoclinic** lattice. The space group was found to be ***P2<sub>1</sub>/n***. The data were integrated using the Bruker SAINT Software program and scaled using the SADABS software program. Solution by direct methods (SHELXT) produced a complete phasing model consistent with the proposed structure.

All nonhydrogen atoms were refined anisotropically by full-matrix least-squares (SHELXL-2014). All carbon bonded hydrogen atoms were placed using a riding model. Their positions were constrained relative to their parent atom using the appropriate HFIX command in SHELXL-2014.

Position of the N-H hydrogen atoms have been refined using Uiso 1.2 of the parent atom and NO constrained DFIX.

Crystallographic data are summarized in Table S2.

Notes: Excellent data and model.

NH group forms hydrogen bond, Table S7

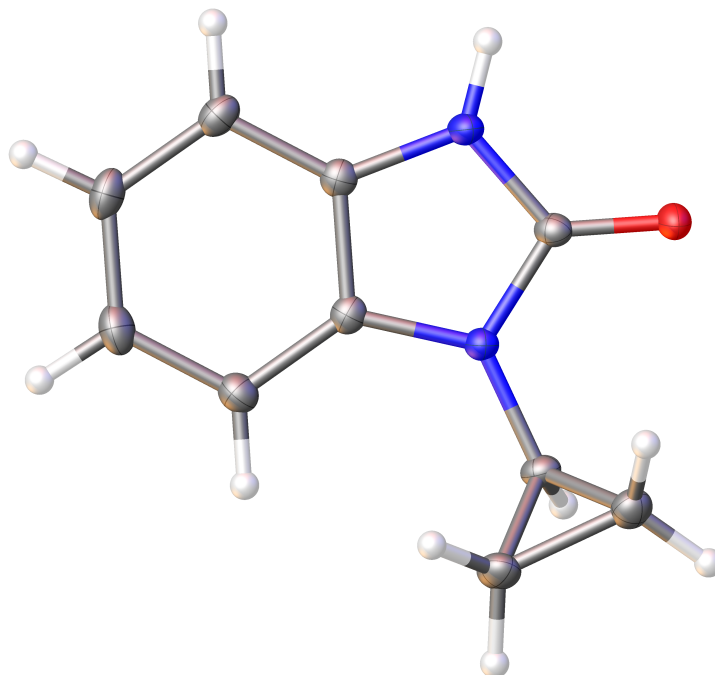

**Table S2.** Crystal data and structure refinement for Engle61 (**8a'**).

|                                   |                                             |                             |
|-----------------------------------|---------------------------------------------|-----------------------------|
| Report date                       | 2017-11-07                                  |                             |
| Identification code               | engle61                                     |                             |
| Empirical formula                 | C10 H10 N2 O                                |                             |
| Molecular formula                 | C10 H10 N2 O                                |                             |
| Formula weight                    | 174.20                                      |                             |
| Temperature                       | 100.0 K                                     |                             |
| Wavelength                        | 0.71073 Å                                   |                             |
| Crystal system                    | Monoclinic                                  |                             |
| Space group                       | P 1 21/n 1                                  |                             |
| Unit cell dimensions              | a = 8.3909(2) Å                             | $\alpha = 90^\circ$ .       |
|                                   | b = 8.3286(2) Å                             | $\beta = 93.482(2)^\circ$ . |
|                                   | c = 12.4602(3) Å                            | $\gamma = 90^\circ$ .       |
| Volume                            | 869.17(4) Å <sup>3</sup>                    |                             |
| Z                                 | 4                                           |                             |
| Density (calculated)              | 1.331 Mg/m <sup>3</sup>                     |                             |
| Absorption coefficient            | 0.089 mm <sup>-1</sup>                      |                             |
| F(000)                            | 368                                         |                             |
| Crystal size                      | 0.25 x 0.24 x 0.2 mm <sup>3</sup>           |                             |
| Crystal color, habit              | colorless block                             |                             |
| Theta range for data collection   | 2.848 to 27.085°.                           |                             |
| Index ranges                      | -10 ≤ h ≤ 10, -10 ≤ k ≤ 10, -15 ≤ l ≤ 15    |                             |
| Reflections collected             | 10049                                       |                             |
| Independent reflections           | 1913 [R(int) = 0.0479]                      |                             |
| Completeness to theta = 25.242°   | 99.9 %                                      |                             |
| Absorption correction             | Semi-empirical from equivalents             |                             |
| Max. and min. transmission        | 0.4917 and 0.4556                           |                             |
| Refinement method                 | Full-matrix least-squares on F <sup>2</sup> |                             |
| Data / restraints / parameters    | 1913 / 0 / 121                              |                             |
| Goodness-of-fit on F <sup>2</sup> | 1.062                                       |                             |
| Final R indices [I > 2σ(I)]       | R1 = 0.0347, wR2 = 0.0932                   |                             |
| R indices (all data)              | R1 = 0.0387, wR2 = 0.0970                   |                             |
| Largest diff. peak and hole       | 0.217 and -0.243 e.Å <sup>-3</sup>          |                             |

**Table S3.** Atomic coordinates ( $\times 10^4$ ) and equivalent isotropic displacement parameters ( $\text{\AA}^2 \times 10^3$ ) for Engle61 (**8a'**).  $U(\text{eq})$  is defined as one third of the trace of the orthogonalized  $U^{ij}$  tensor.

|       | x       | y       | z       | $U(\text{eq})$ |
|-------|---------|---------|---------|----------------|
| O(1)  | 7009(1) | 5264(1) | 2410(1) | 18(1)          |
| N(1)  | 7427(1) | 5621(1) | 4266(1) | 14(1)          |
| N(2)  | 7759(1) | 3194(1) | 3599(1) | 16(1)          |
| C(1)  | 7364(1) | 4743(1) | 3323(1) | 15(1)          |
| C(2)  | 8123(1) | 3094(1) | 4700(1) | 15(1)          |
| C(3)  | 8582(1) | 1803(1) | 5348(1) | 18(1)          |
| C(4)  | 8874(1) | 2104(1) | 6445(1) | 21(1)          |
| C(5)  | 8717(1) | 3642(2) | 6863(1) | 22(1)          |
| C(6)  | 8244(1) | 4946(1) | 6211(1) | 18(1)          |
| C(7)  | 7936(1) | 4637(1) | 5126(1) | 15(1)          |
| C(8)  | 7106(1) | 7312(1) | 4294(1) | 15(1)          |
| C(9)  | 5924(1) | 7908(1) | 5066(1) | 20(1)          |
| C(10) | 5479(1) | 7872(1) | 3879(1) | 20(1)          |

**Table S4.** Bond lengths [Å] and angles [°] for Engle61 (**8a'**).

|                |            |                     |            |
|----------------|------------|---------------------|------------|
| O(1)-C(1)      | 1.2370(12) | C(3)-C(2)-C(7)      | 121.65(10) |
| N(1)-C(1)      | 1.3824(13) | C(2)-C(3)-H(3)      | 121.4      |
| N(1)-C(7)      | 1.3945(13) | C(2)-C(3)-C(4)      | 117.21(10) |
| N(1)-C(8)      | 1.4346(13) | C(4)-C(3)-H(3)      | 121.4      |
| N(2)-C(1)      | 1.3700(13) | C(3)-C(4)-H(4)      | 119.5      |
| N(2)-C(2)      | 1.3905(13) | C(5)-C(4)-C(3)      | 121.06(10) |
| N(2)-H(2)      | 0.925(15)  | C(5)-C(4)-H(4)      | 119.5      |
| C(2)-C(3)      | 1.3844(14) | C(4)-C(5)-H(5)      | 119.1      |
| C(2)-C(7)      | 1.4032(14) | C(4)-C(5)-C(6)      | 121.80(10) |
| C(3)-H(3)      | 0.9500     | C(6)-C(5)-H(5)      | 119.1      |
| C(3)-C(4)      | 1.3972(16) | C(5)-C(6)-H(6)      | 121.5      |
| C(4)-H(4)      | 0.9500     | C(7)-C(6)-C(5)      | 116.90(10) |
| C(4)-C(5)      | 1.3924(17) | C(7)-C(6)-H(6)      | 121.5      |
| C(5)-H(5)      | 0.9500     | N(1)-C(7)-C(2)      | 106.54(9)  |
| C(5)-C(6)      | 1.3993(16) | C(6)-C(7)-N(1)      | 132.11(10) |
| C(6)-H(6)      | 0.9500     | C(6)-C(7)-C(2)      | 121.36(10) |
| C(6)-C(7)      | 1.3852(14) | N(1)-C(8)-H(8)      | 116.4      |
| C(8)-H(8)      | 1.0000     | N(1)-C(8)-C(9)      | 118.04(9)  |
| C(8)-C(9)      | 1.5076(15) | N(1)-C(8)-C(10)     | 117.67(9)  |
| C(8)-C(10)     | 1.5042(15) | C(9)-C(8)-H(8)      | 116.4      |
| C(9)-H(9A)     | 0.9900     | C(10)-C(8)-H(8)     | 116.4      |
| C(9)-H(9B)     | 0.9900     | C(10)-C(8)-C(9)     | 59.92(7)   |
| C(9)-C(10)     | 1.5040(15) | C(8)-C(9)-H(9A)     | 117.8      |
| C(10)-H(10A)   | 0.9900     | C(8)-C(9)-H(9B)     | 117.8      |
| C(10)-H(10B)   | 0.9900     | H(9A)-C(9)-H(9B)    | 114.9      |
|                |            | C(10)-C(9)-C(8)     | 59.93(7)   |
| C(1)-N(1)-C(7) | 109.60(9)  | C(10)-C(9)-H(9A)    | 117.8      |
| C(1)-N(1)-C(8) | 122.83(9)  | C(10)-C(9)-H(9B)    | 117.8      |
| C(7)-N(1)-C(8) | 127.45(9)  | C(8)-C(10)-H(10A)   | 117.8      |
| C(1)-N(2)-C(2) | 109.83(8)  | C(8)-C(10)-H(10B)   | 117.8      |
| C(1)-N(2)-H(2) | 124.8(9)   | C(9)-C(10)-C(8)     | 60.15(7)   |
| C(2)-N(2)-H(2) | 125.3(9)   | C(9)-C(10)-H(10A)   | 117.8      |
| O(1)-C(1)-N(1) | 126.18(10) | C(9)-C(10)-H(10B)   | 117.8      |
| O(1)-C(1)-N(2) | 127.00(10) | H(10A)-C(10)-H(10B) | 114.9      |
| N(2)-C(1)-N(1) | 106.82(9)  |                     |            |
| N(2)-C(2)-C(7) | 107.14(9)  |                     |            |
| C(3)-C(2)-N(2) | 131.21(10) |                     |            |

**Table S5.** Anisotropic displacement parameters ( $\text{\AA}^2 \times 10^3$ ) for Engle61 (**8a'**). The anisotropic displacement factor exponent takes the form:  $-2\pi^2 [ h^2 a^{*2} U^{11} + \dots + 2 h k a^* b^* U^{12} ]$

|       | U <sup>11</sup> | U <sup>22</sup> | U <sup>33</sup> | U <sup>23</sup> | U <sup>13</sup> | U <sup>12</sup> |
|-------|-----------------|-----------------|-----------------|-----------------|-----------------|-----------------|
| O(1)  | 26(1)           | 15(1)           | 14(1)           | 1(1)            | 1(1)            | -1(1)           |
| N(1)  | 18(1)           | 12(1)           | 13(1)           | -1(1)           | 1(1)            | 0(1)            |
| N(2)  | 22(1)           | 12(1)           | 14(1)           | -1(1)           | 2(1)            | 1(1)            |
| C(1)  | 16(1)           | 13(1)           | 16(1)           | -1(1)           | 3(1)            | -2(1)           |
| C(2)  | 12(1)           | 17(1)           | 16(1)           | 1(1)            | 2(1)            | -1(1)           |
| C(3)  | 15(1)           | 16(1)           | 24(1)           | 4(1)            | 2(1)            | 1(1)            |
| C(4)  | 16(1)           | 24(1)           | 22(1)           | 9(1)            | -1(1)           | 1(1)            |
| C(5)  | 20(1)           | 29(1)           | 16(1)           | 3(1)            | -2(1)           | -3(1)           |
| C(6)  | 18(1)           | 20(1)           | 17(1)           | -2(1)           | 1(1)            | -2(1)           |
| C(7)  | 12(1)           | 16(1)           | 16(1)           | 2(1)            | 2(1)            | -1(1)           |
| C(8)  | 17(1)           | 11(1)           | 18(1)           | -1(1)           | 3(1)            | 0(1)            |
| C(9)  | 23(1)           | 18(1)           | 20(1)           | -2(1)           | 6(1)            | 3(1)            |
| C(10) | 20(1)           | 19(1)           | 21(1)           | 1(1)            | 2(1)            | 4(1)            |



**Table S6.** Hydrogen coordinates ( $\times 10^4$ ) and isotropic displacement parameters ( $\text{\AA}^2 \times 10^{-3}$ ) for Engle61 (**8a'**).

|        | x        | y        | z        | U(eq) |
|--------|----------|----------|----------|-------|
| H(3)   | 8693     | 757      | 5058     | 22    |
| H(4)   | 9185     | 1245     | 6914     | 25    |
| H(5)   | 8937     | 3812     | 7611     | 26    |
| H(6)   | 8138     | 5994     | 6499     | 22    |
| H(8)   | 8020     | 8042     | 4163     | 18    |
| H(9A)  | 5422     | 7105     | 5525     | 24    |
| H(9B)  | 6125     | 8968     | 5408     | 24    |
| H(10A) | 5406     | 8911     | 3492     | 24    |
| H(10B) | 4703     | 7049     | 3610     | 24    |
| H(2)   | 7815(16) | 2354(18) | 3117(11) | 24    |

**Table S7.** Hydrogen bonds for Engle61 (**8a'**) [ $\text{\AA}$  and  $^\circ$ ].

| D-H...A            | d(D-H)    | d(H...A)  | d(D...A)   | $\angle$ (DHA) |
|--------------------|-----------|-----------|------------|----------------|
| N(2)-H(2)...O(1)#1 | 0.925(15) | 1.869(15) | 2.7574(12) | 160.2(13)      |

Symmetry transformations used to generate equivalent atoms:

#1  $-x+3/2, y-1/2, -z+1/2$

# NMR SPECTRA

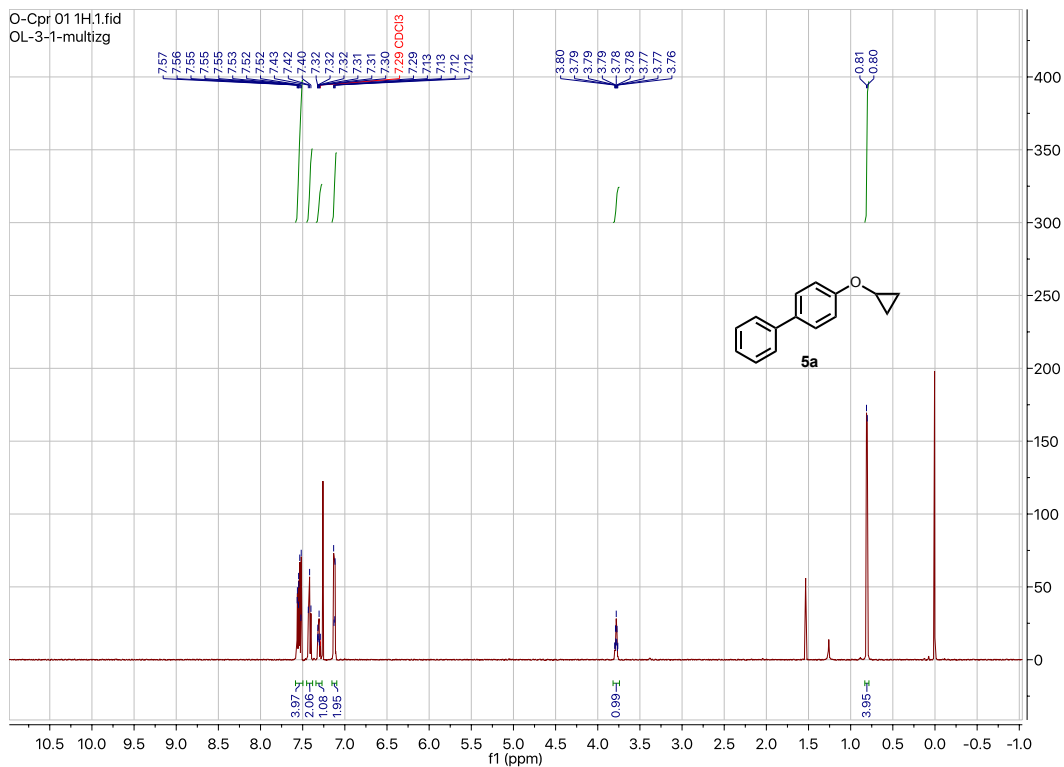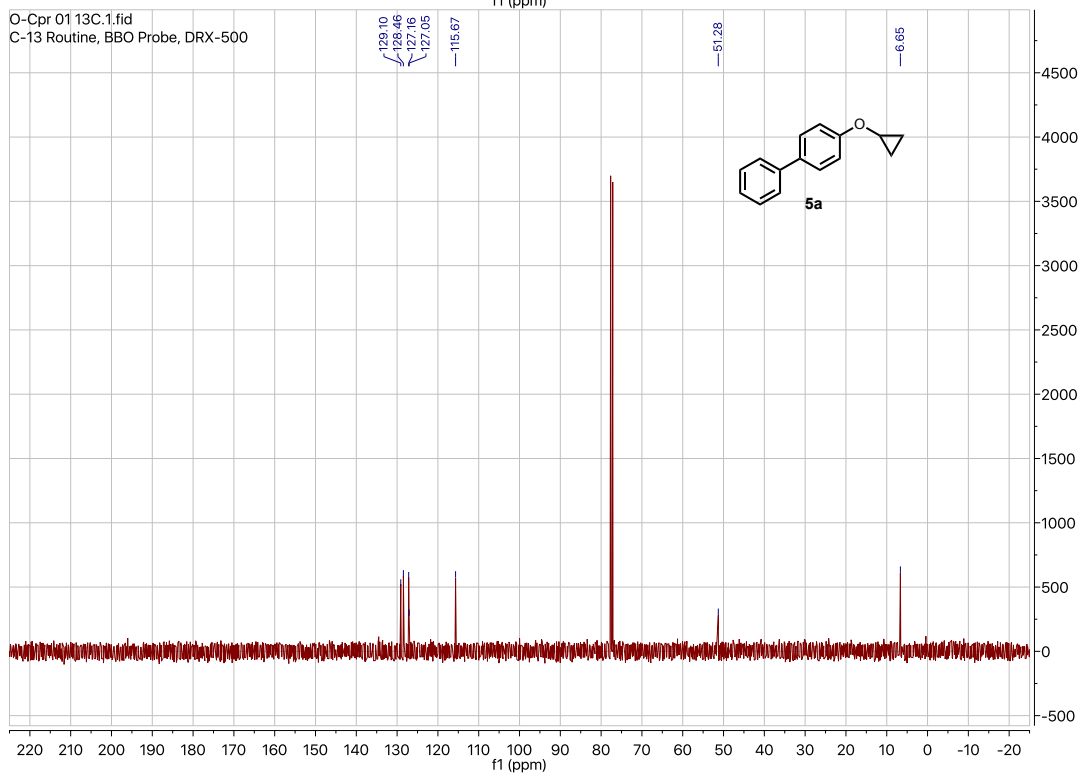

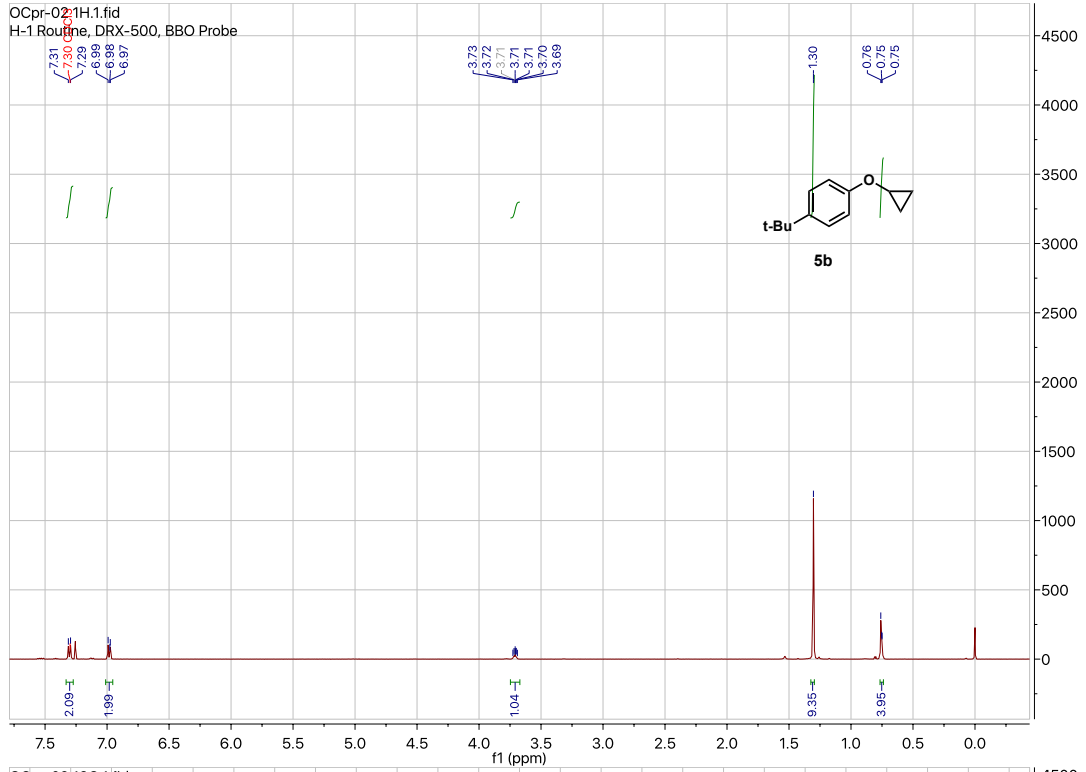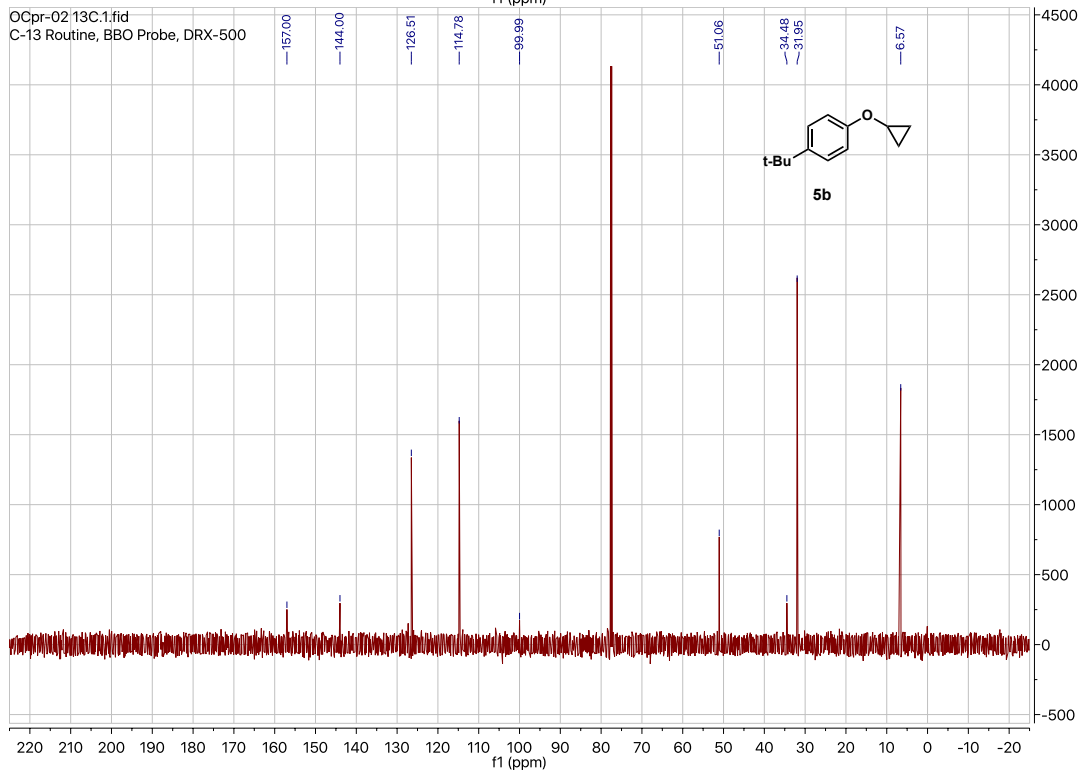

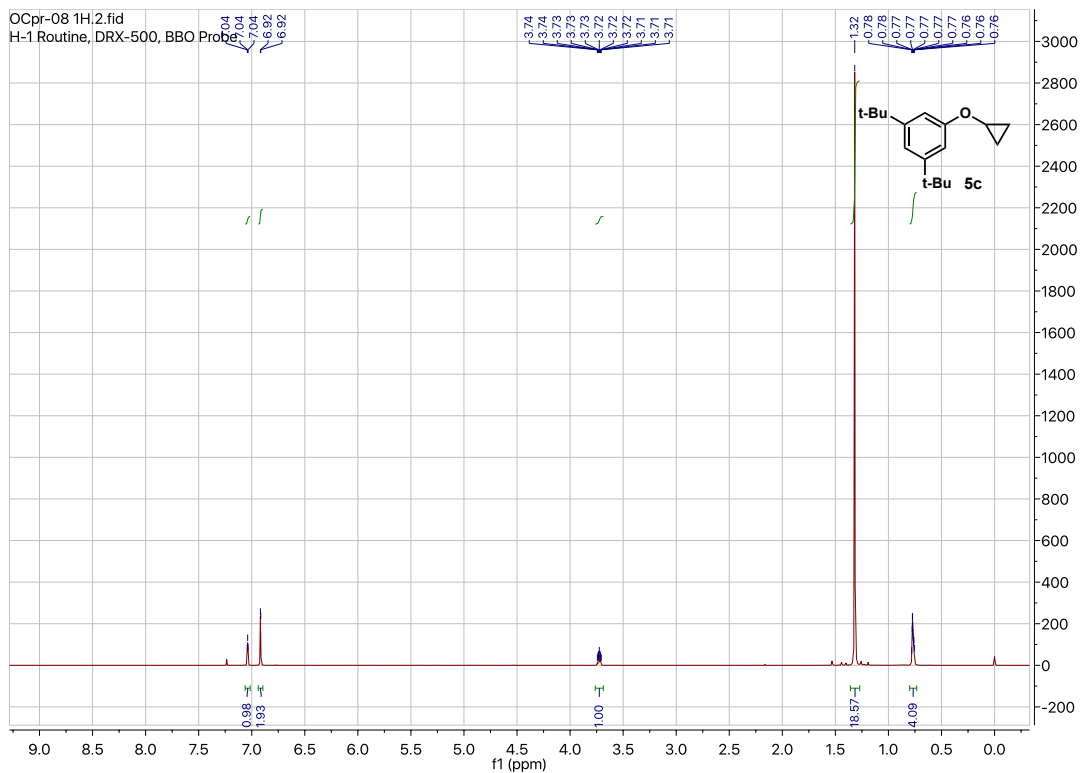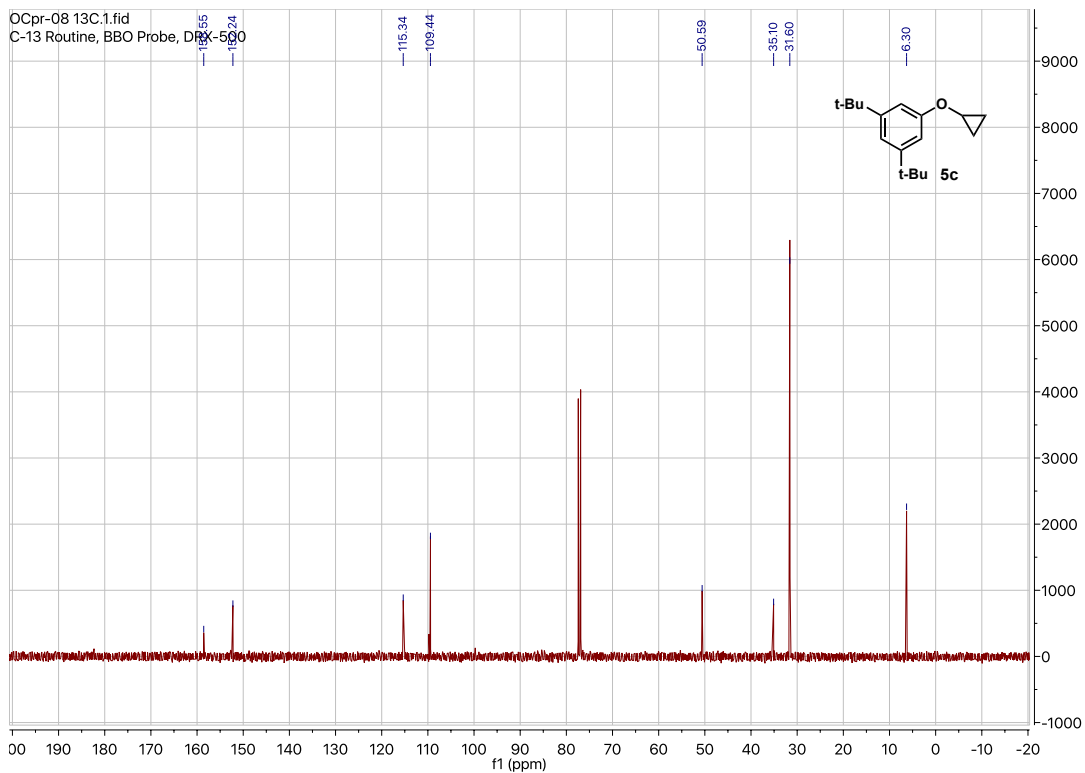

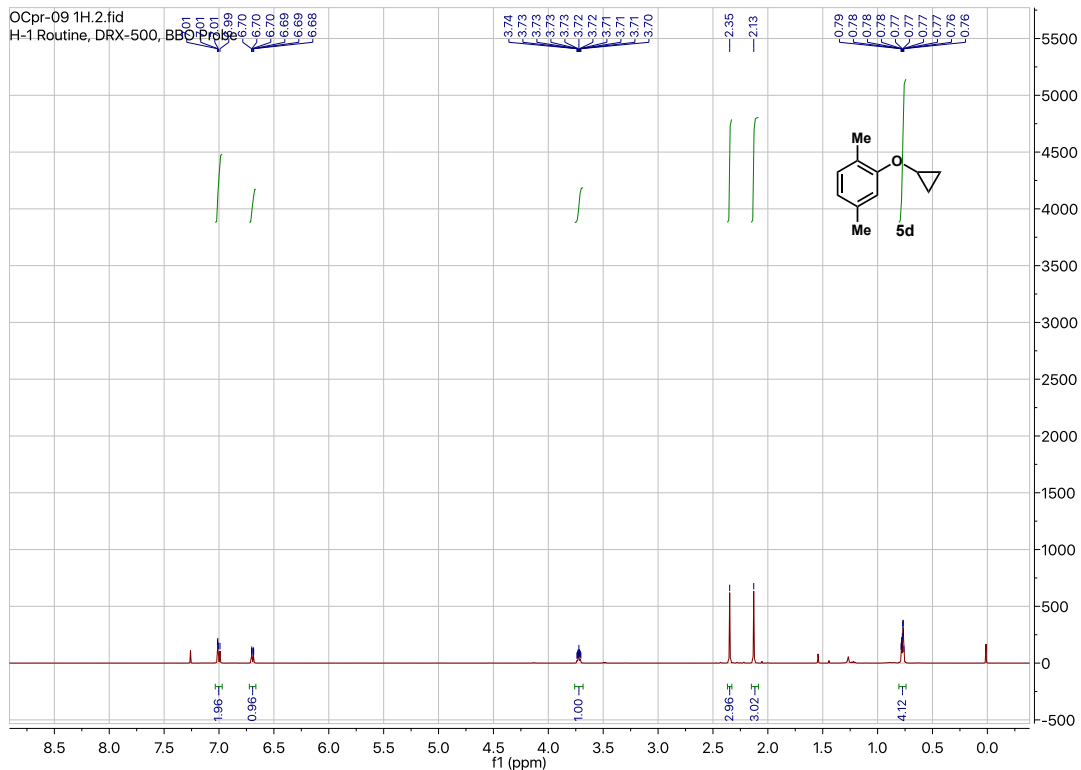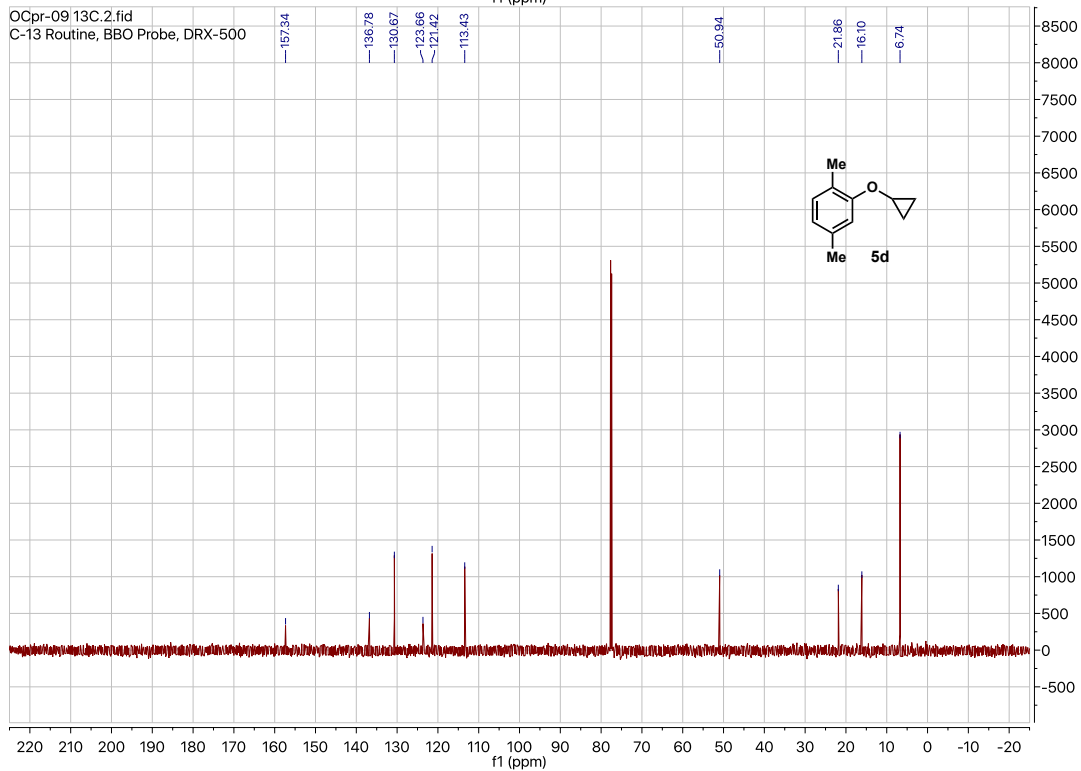

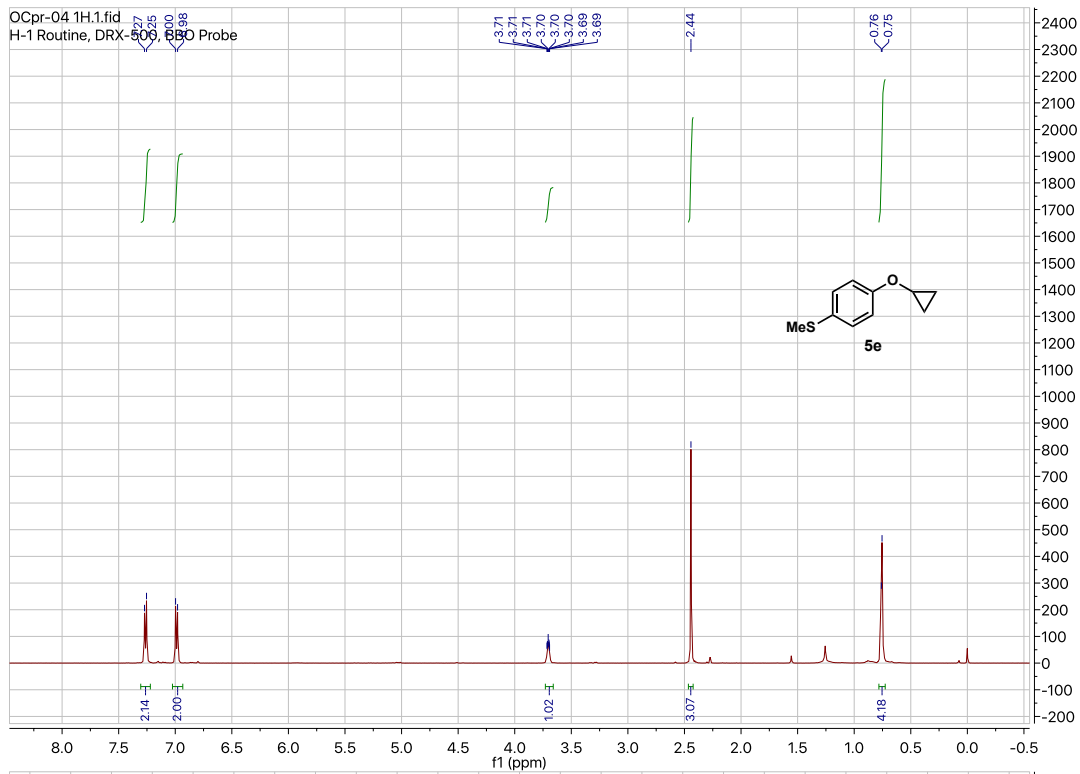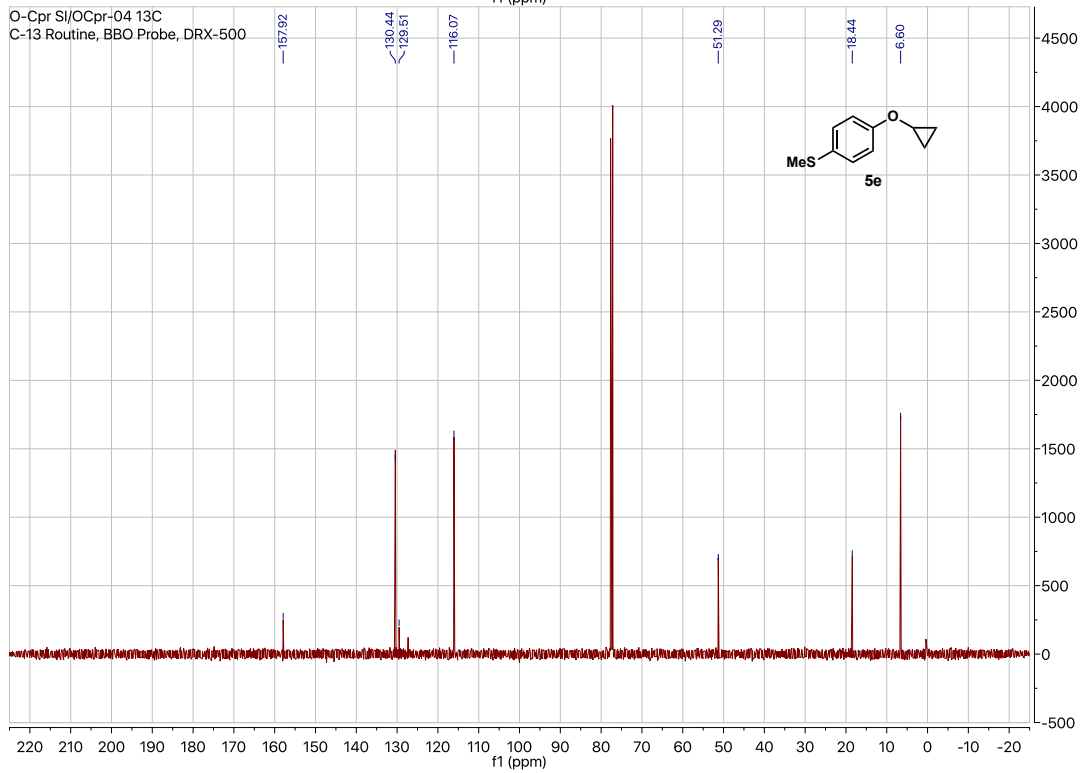

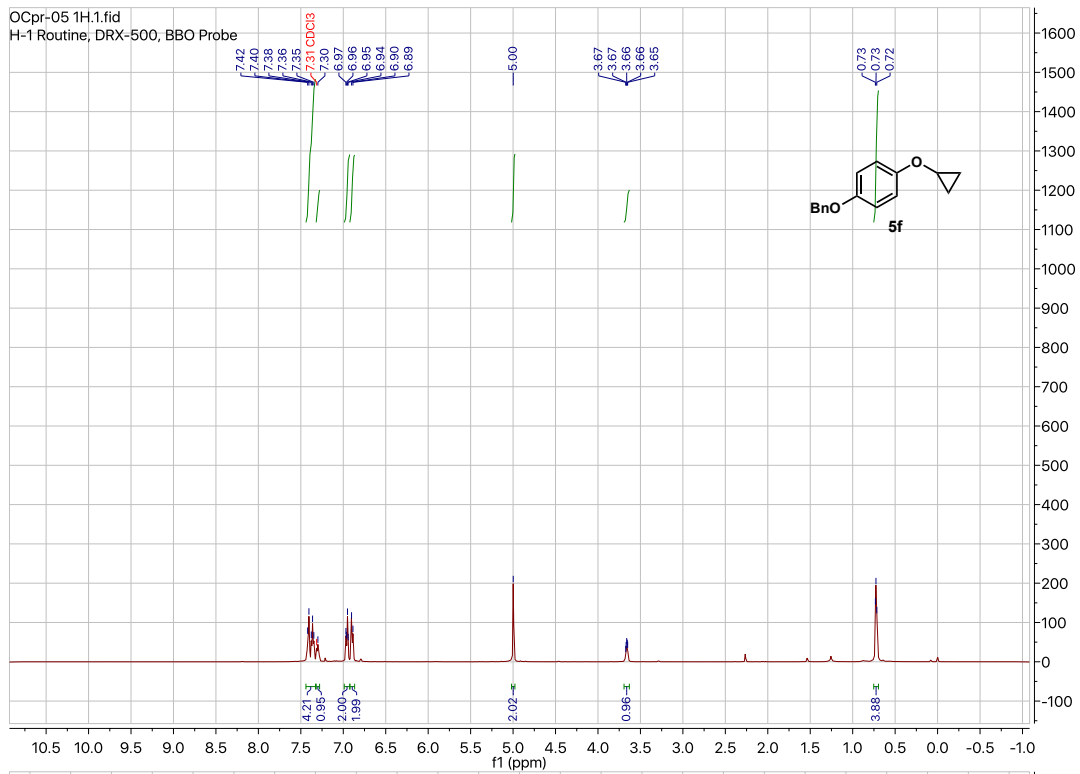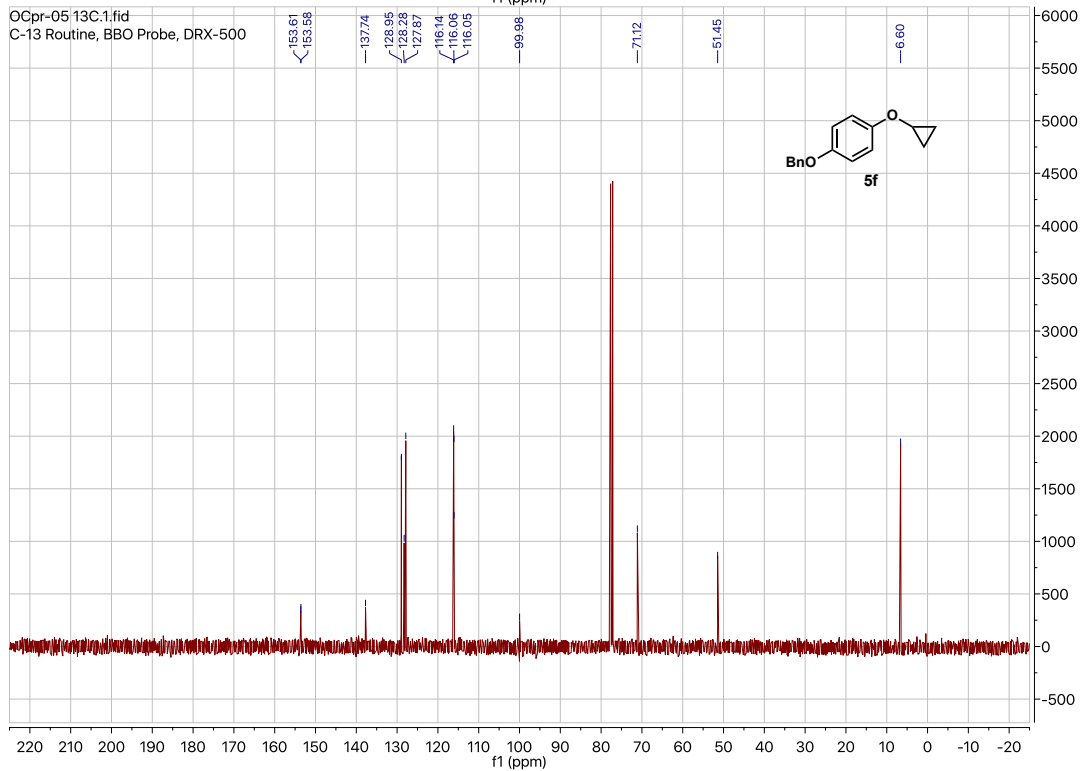

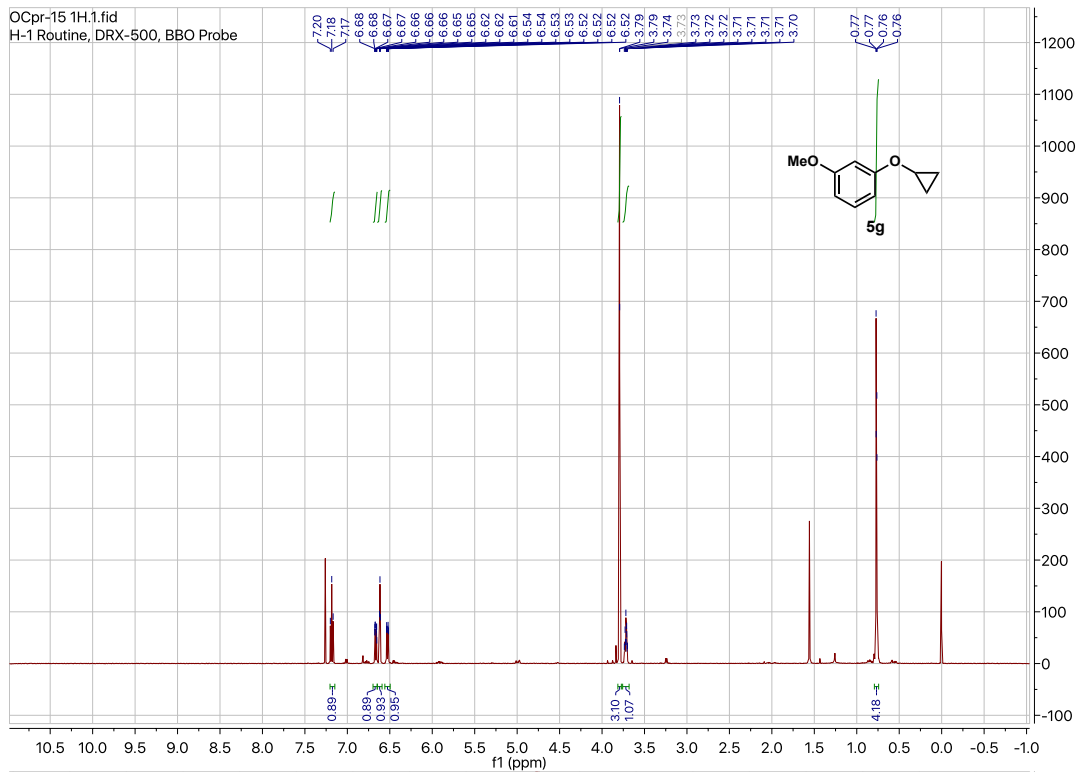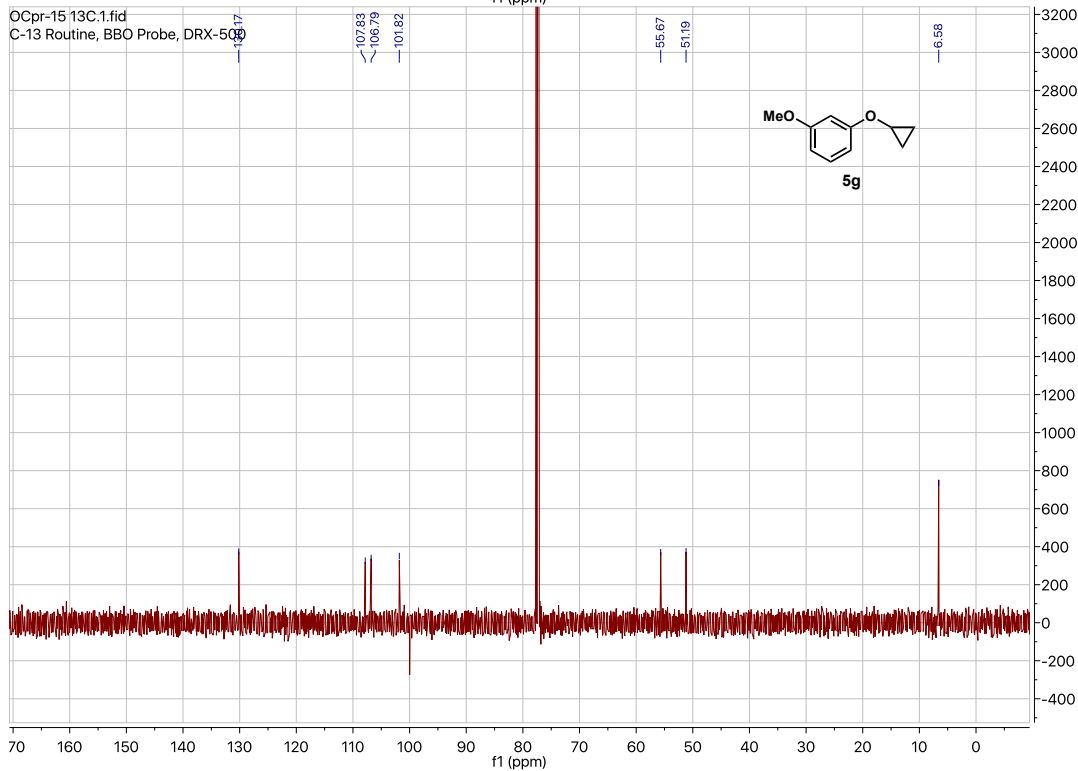



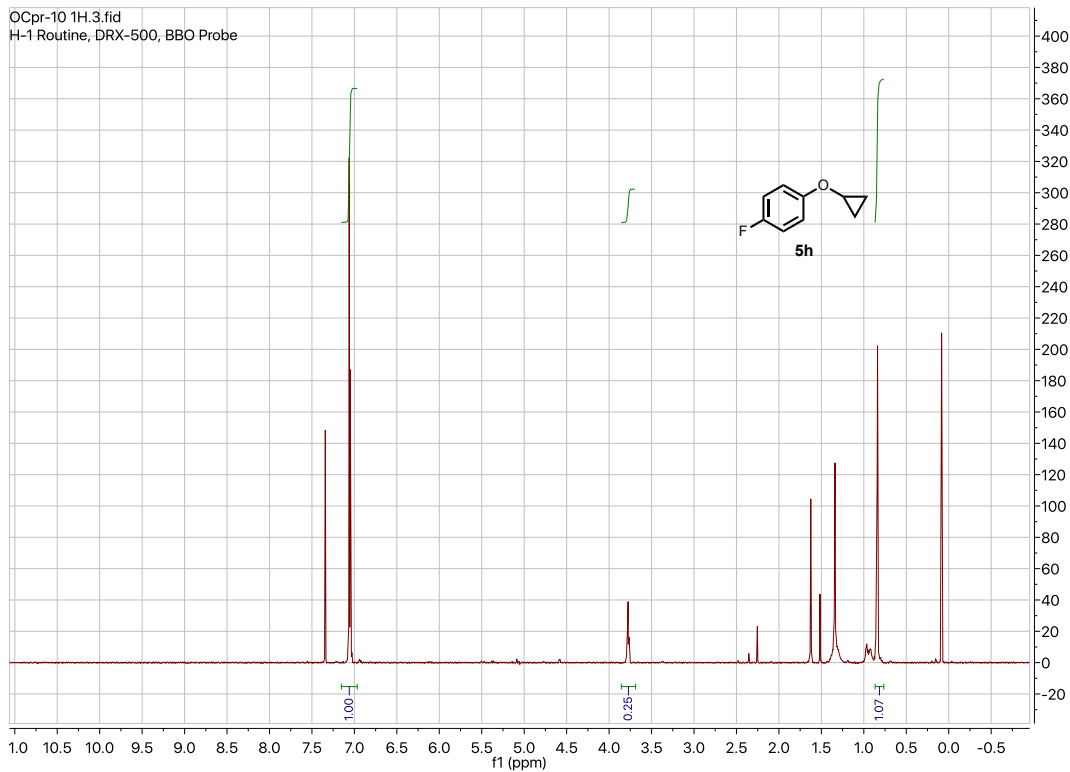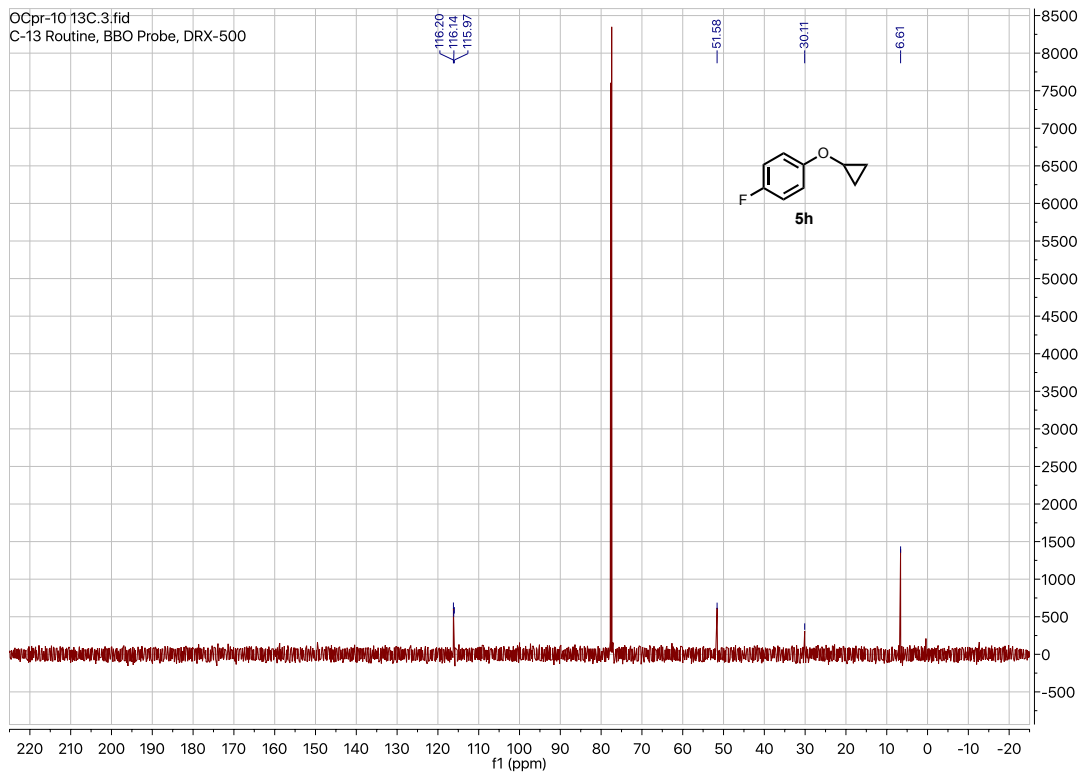

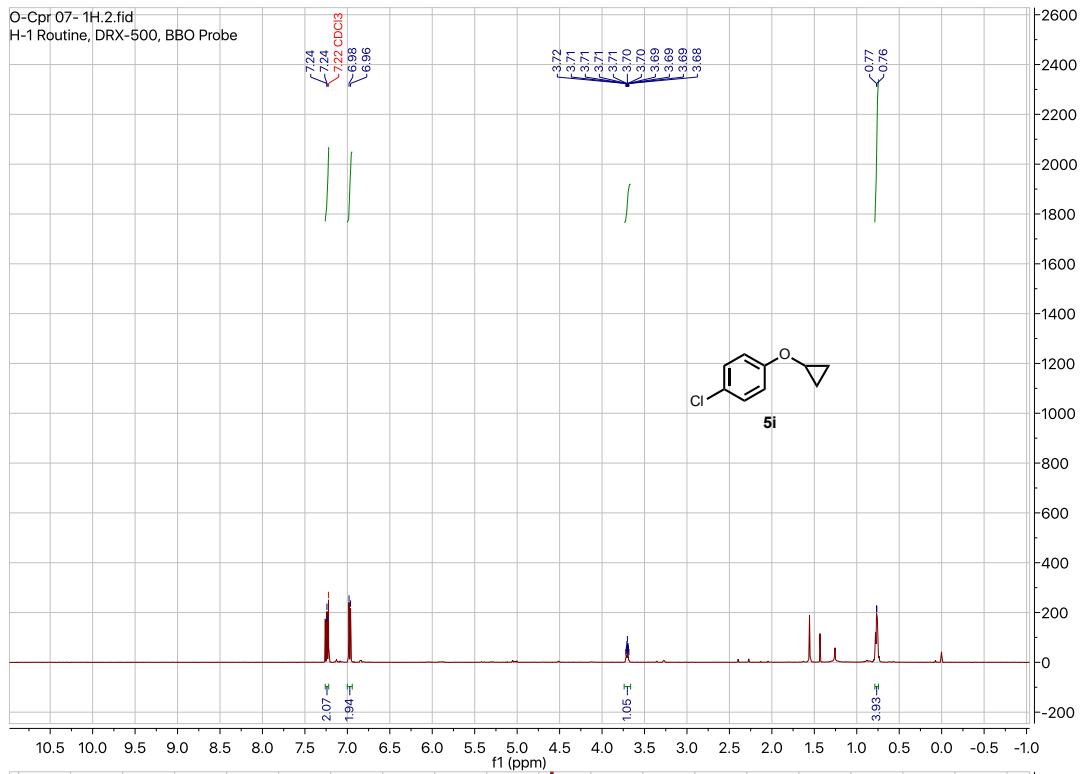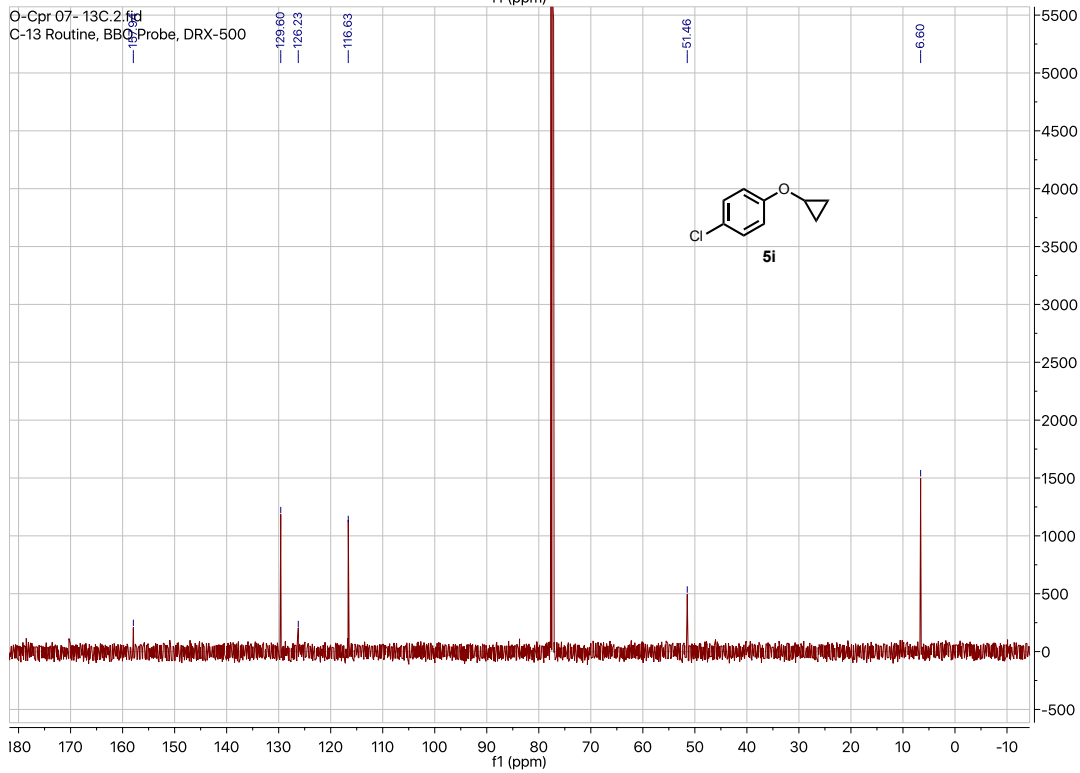

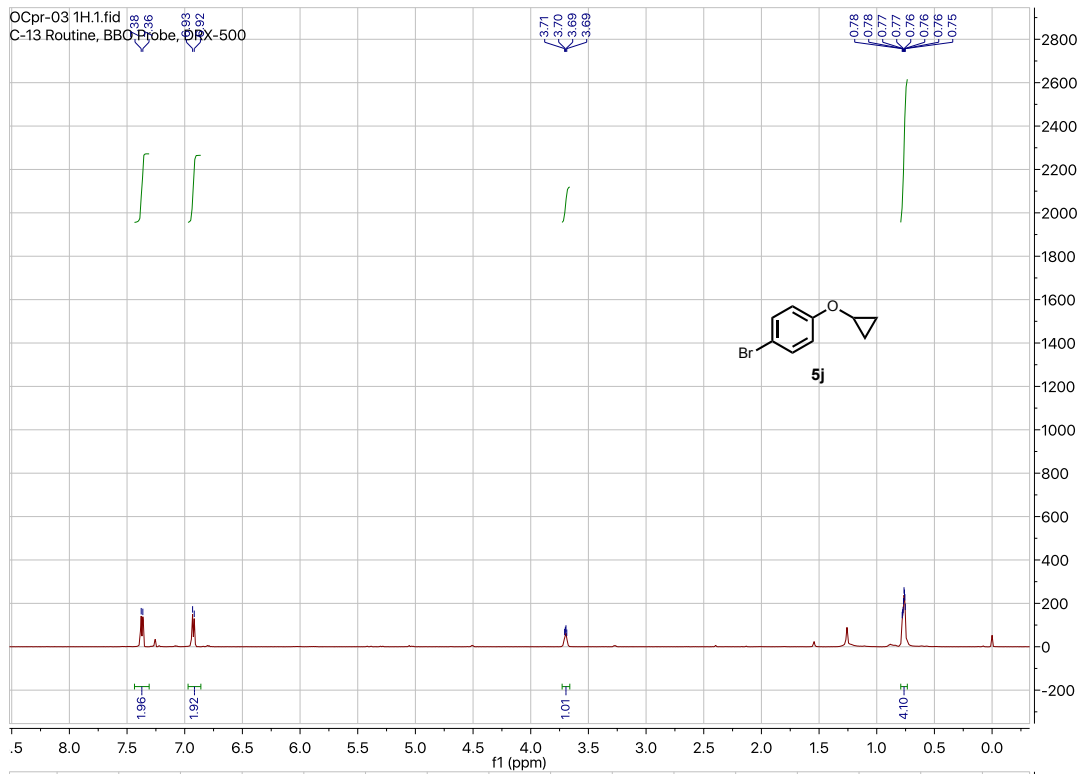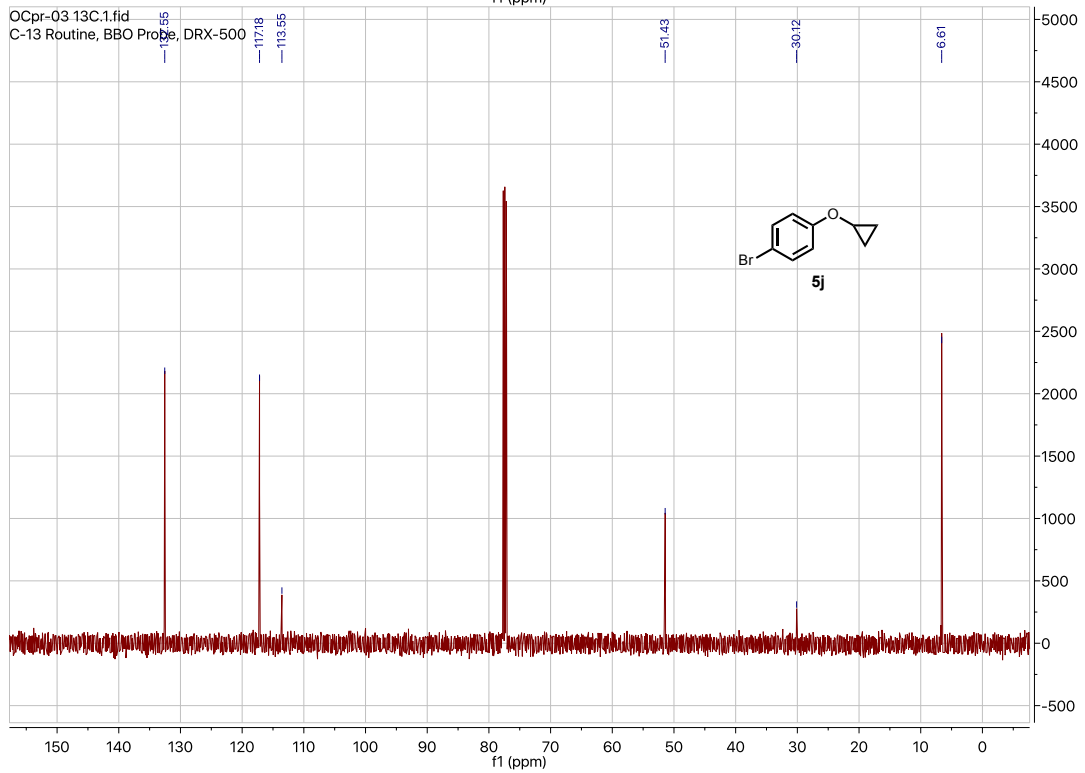

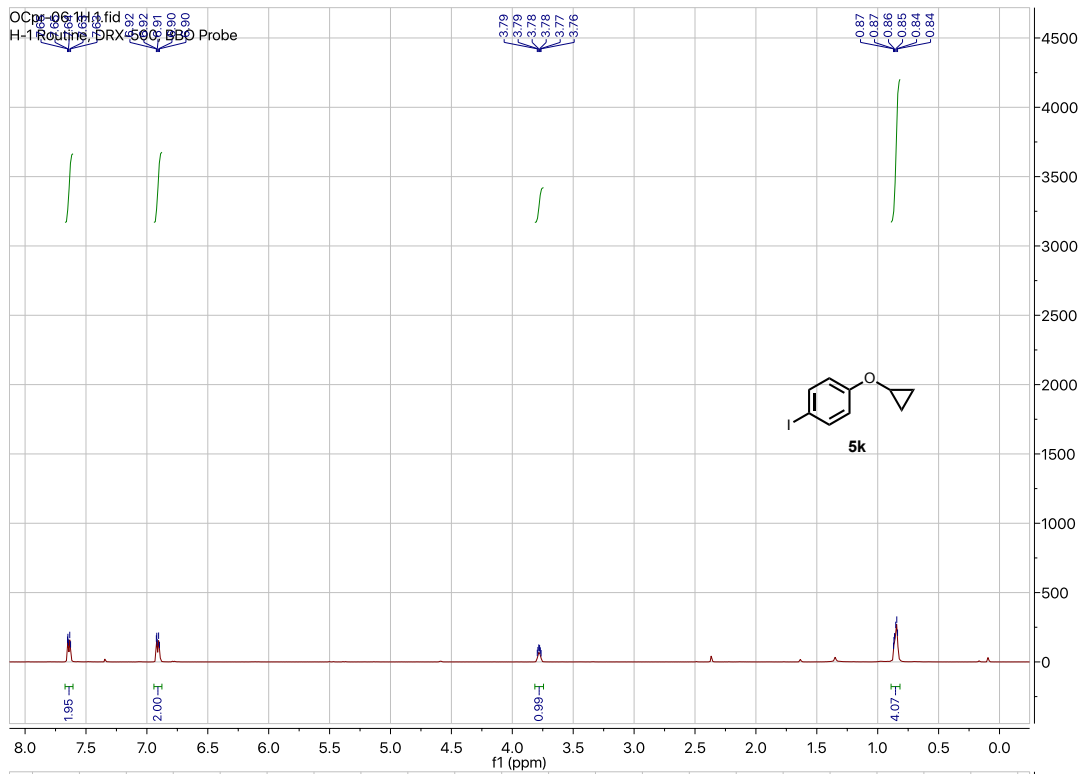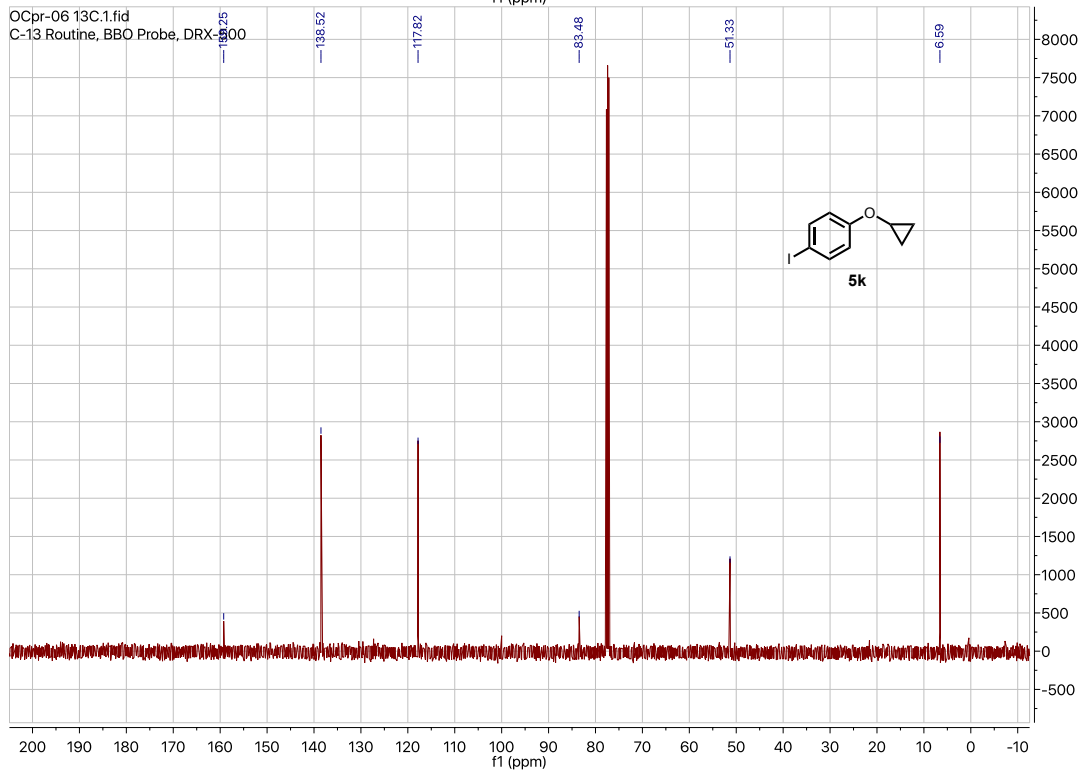

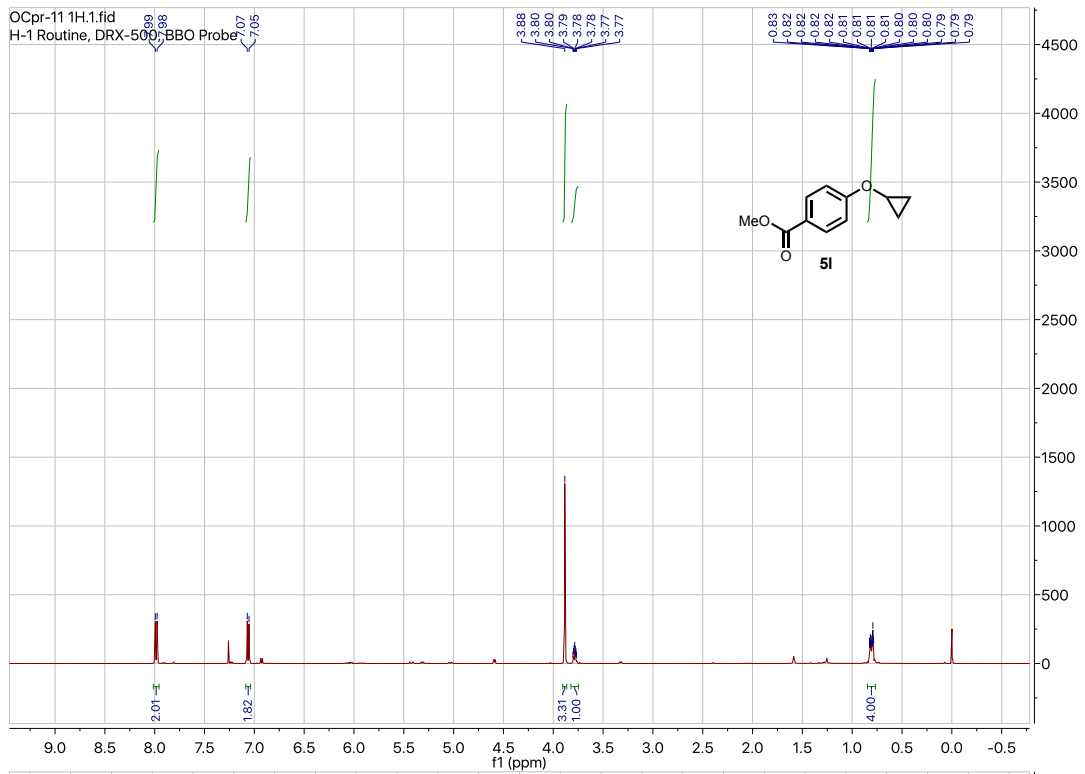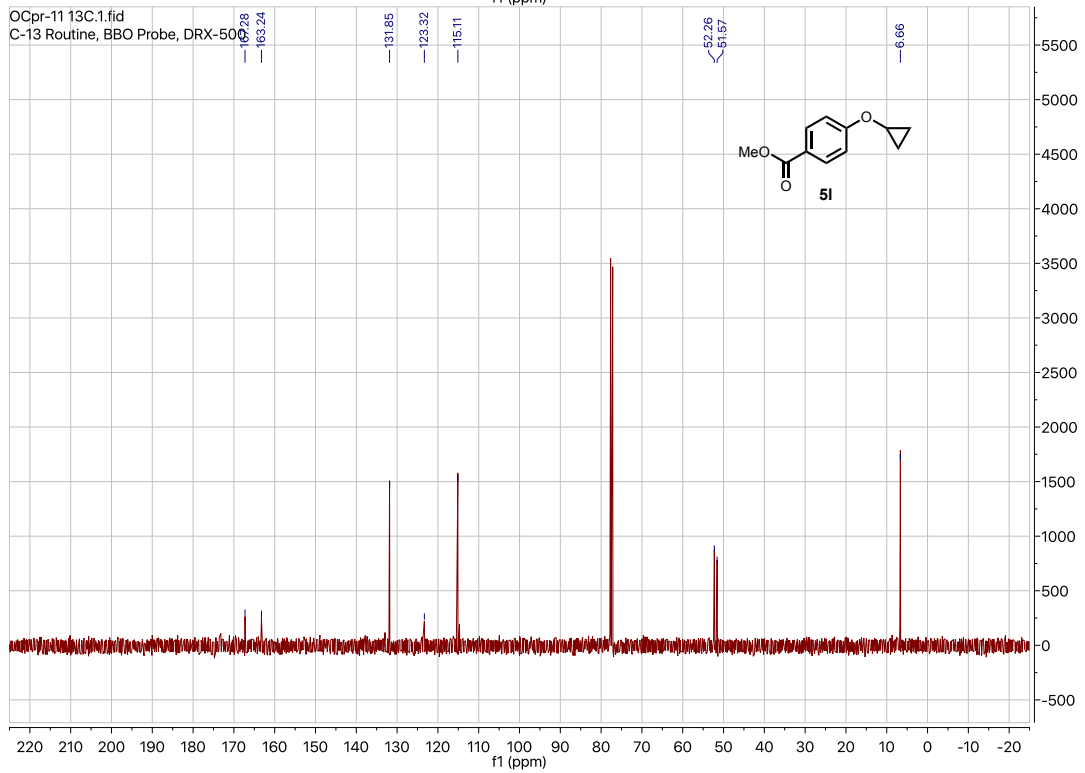

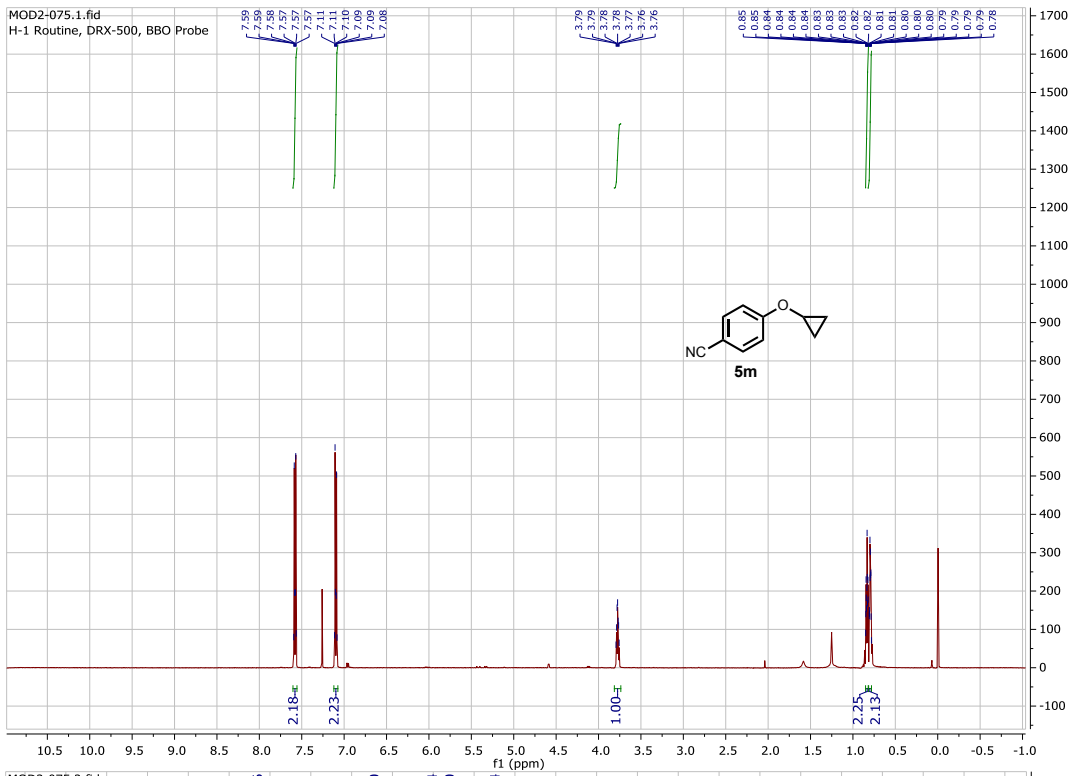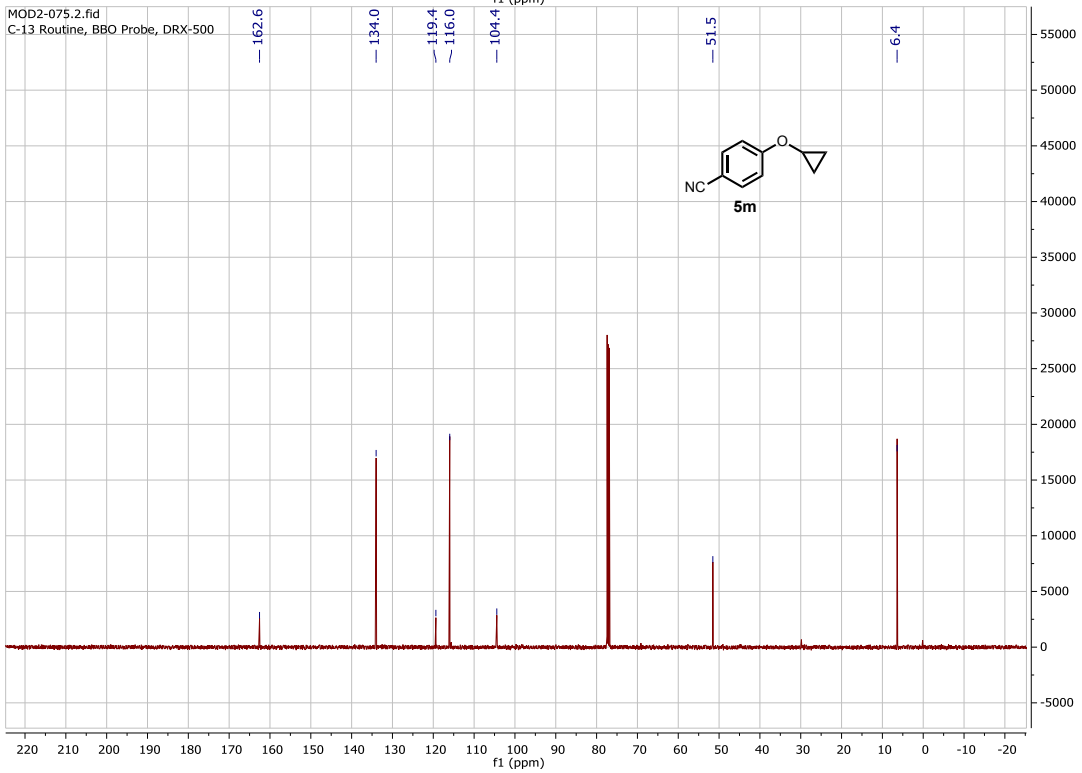

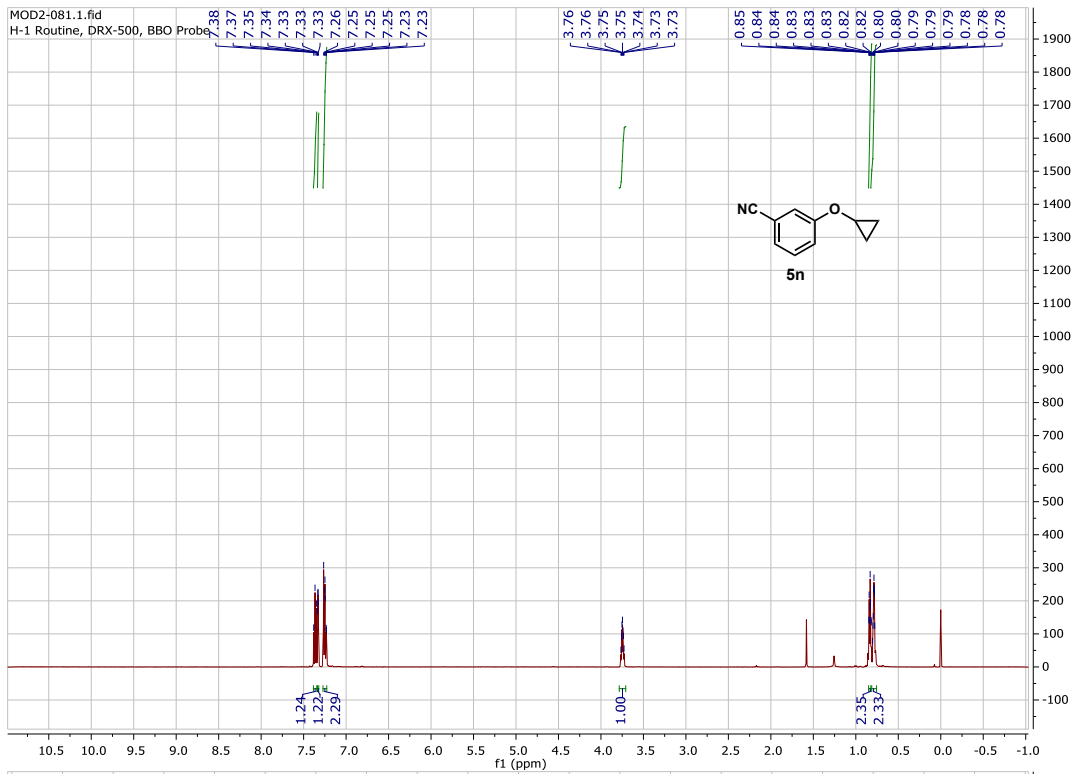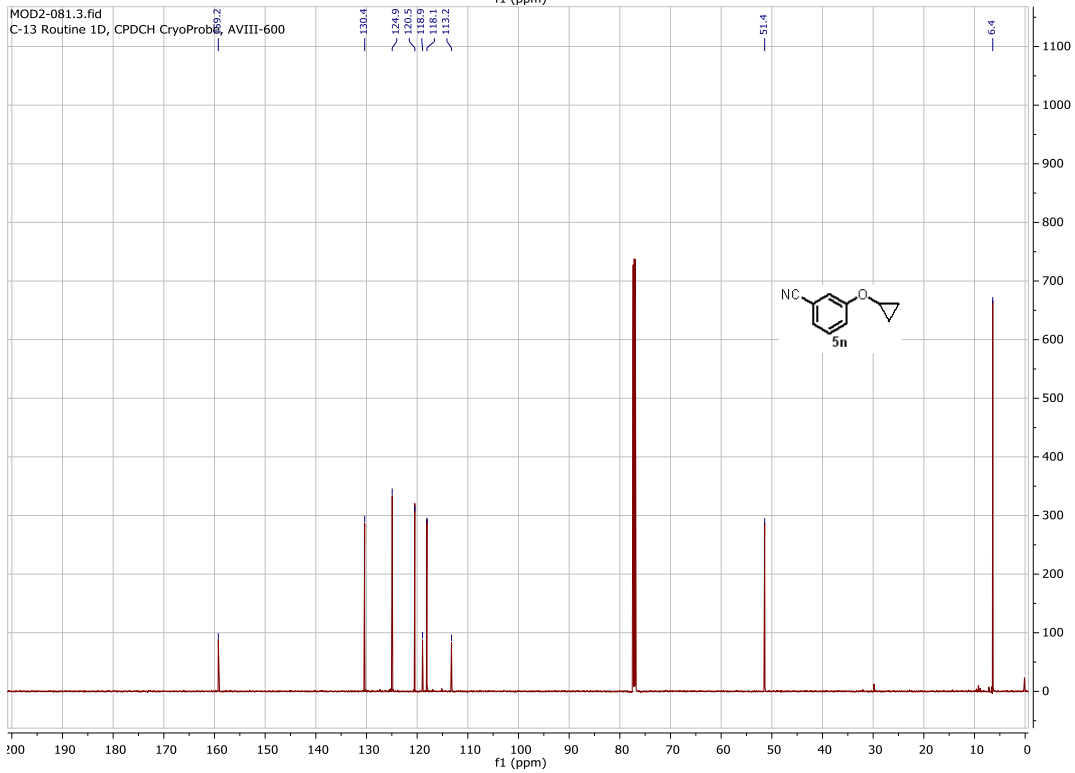

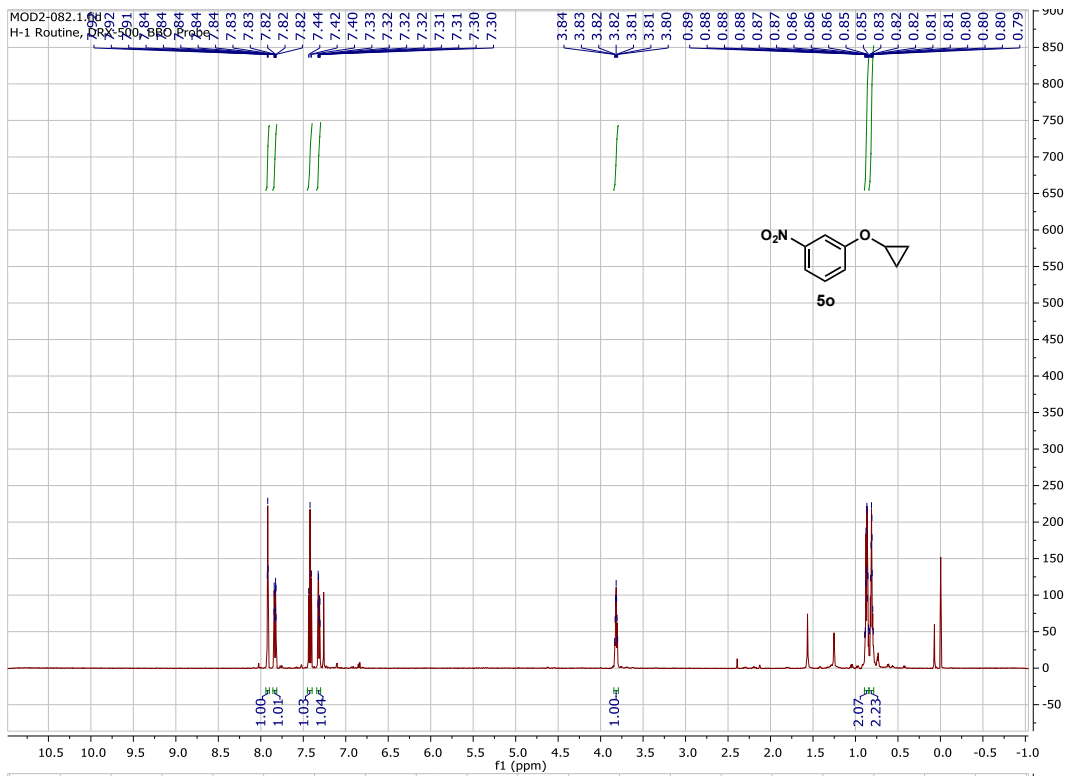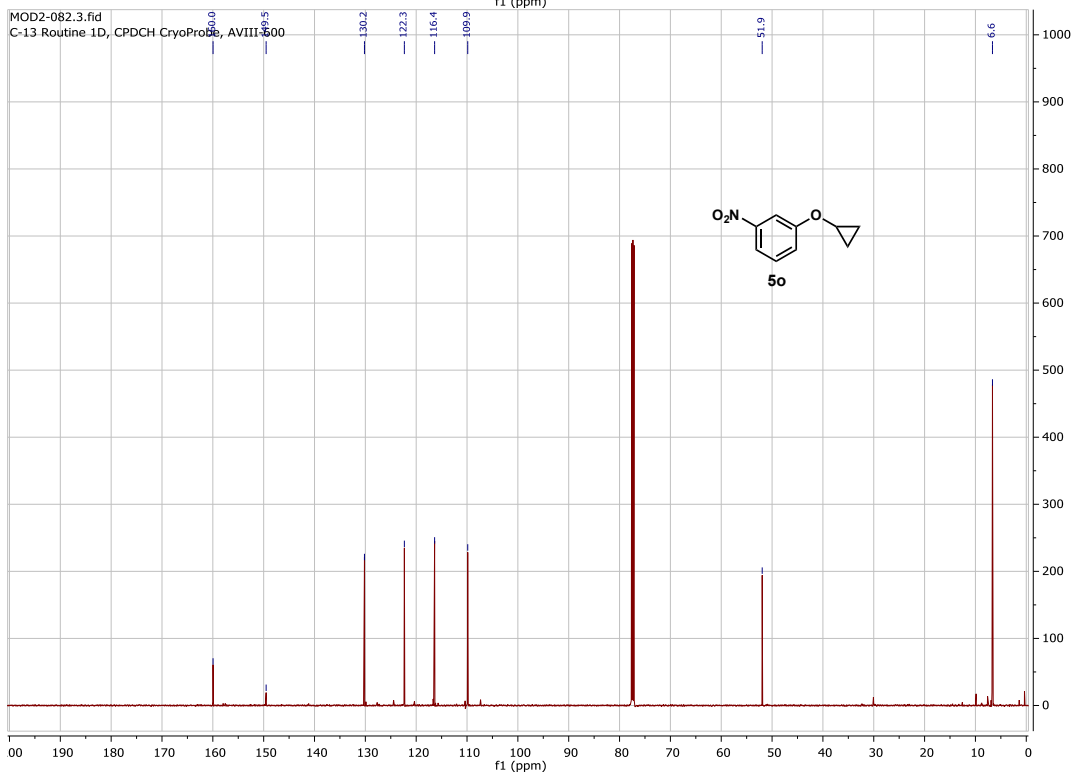



Spectrum is Consistent with Structure

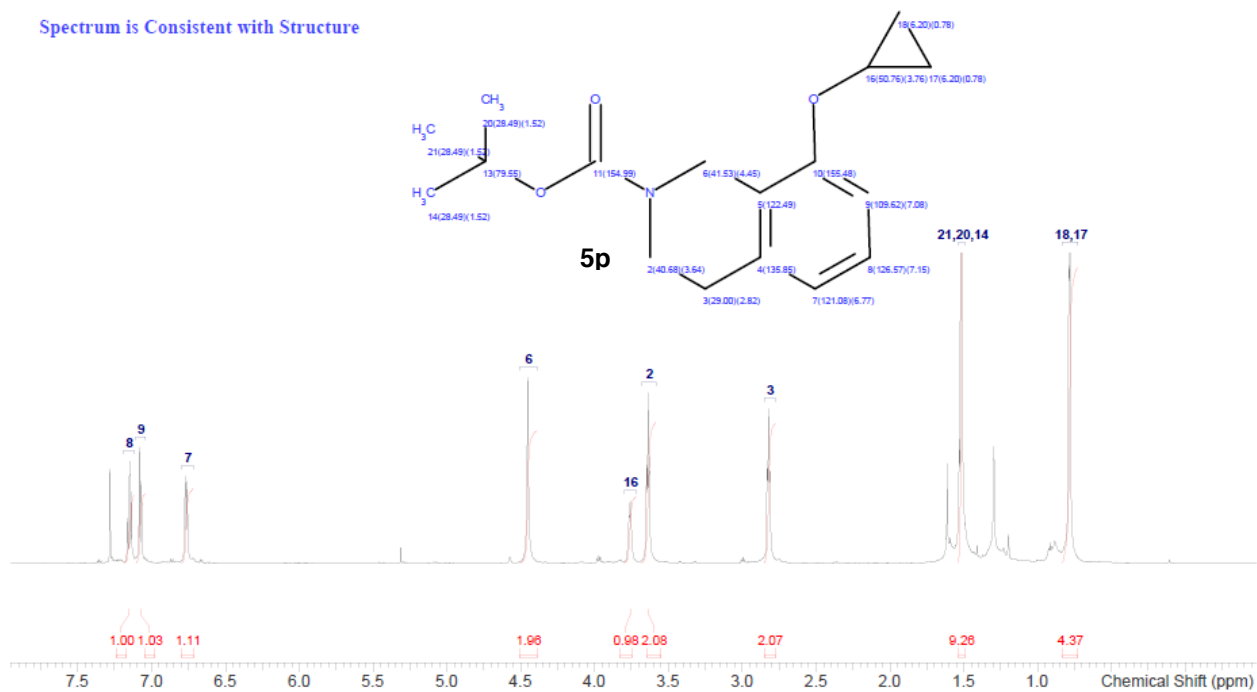

Spectrum is Consistent with Structure

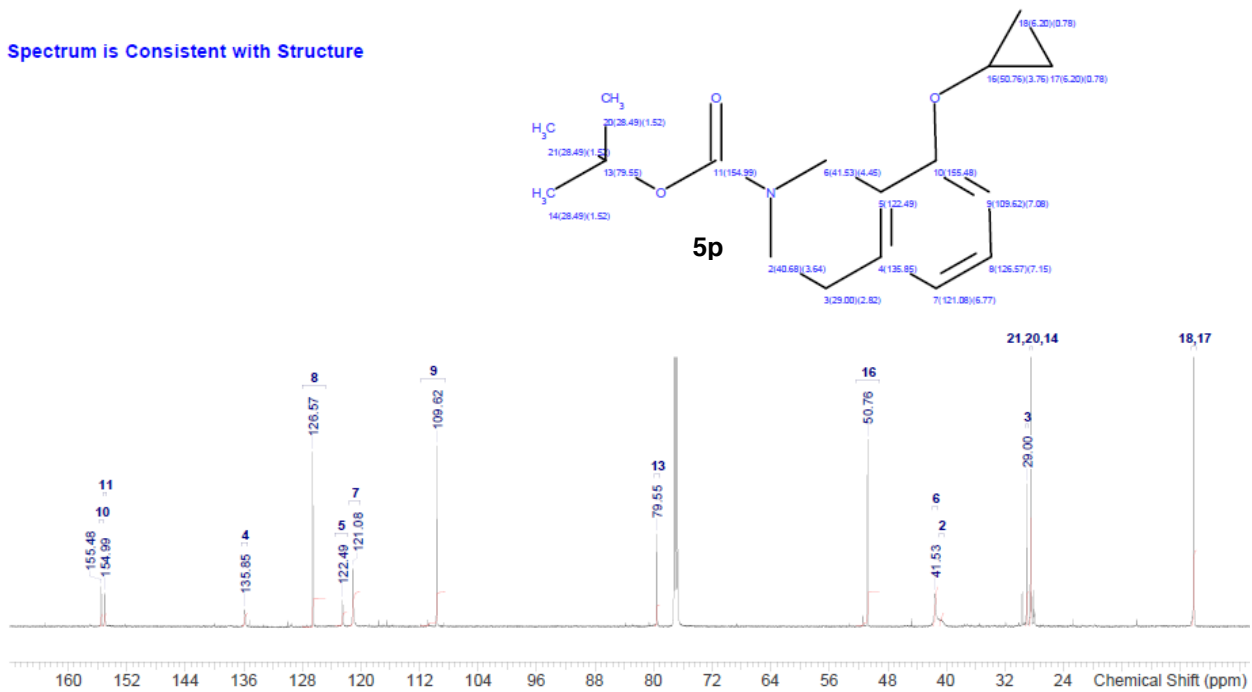

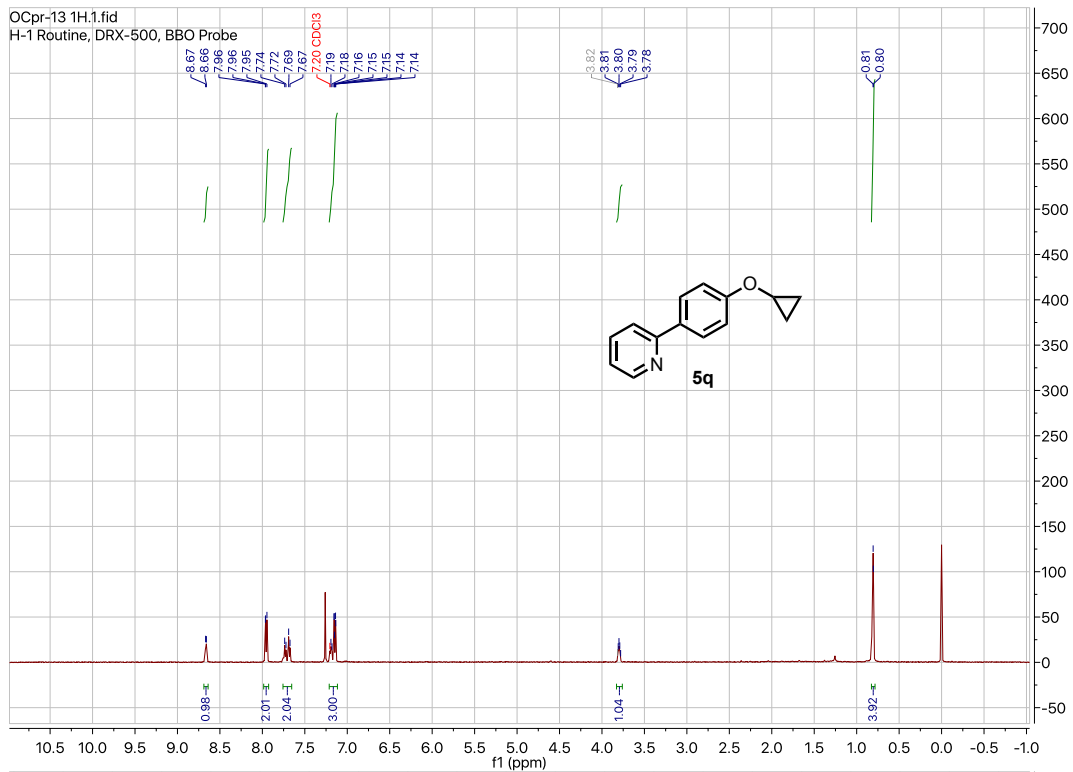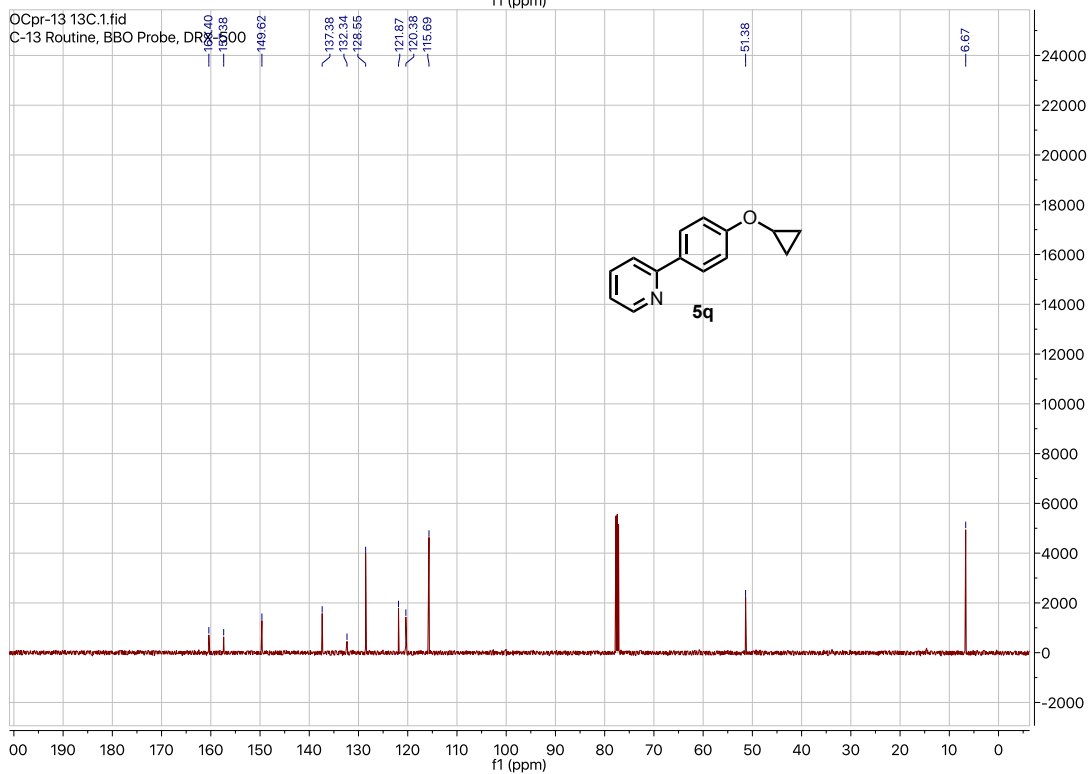

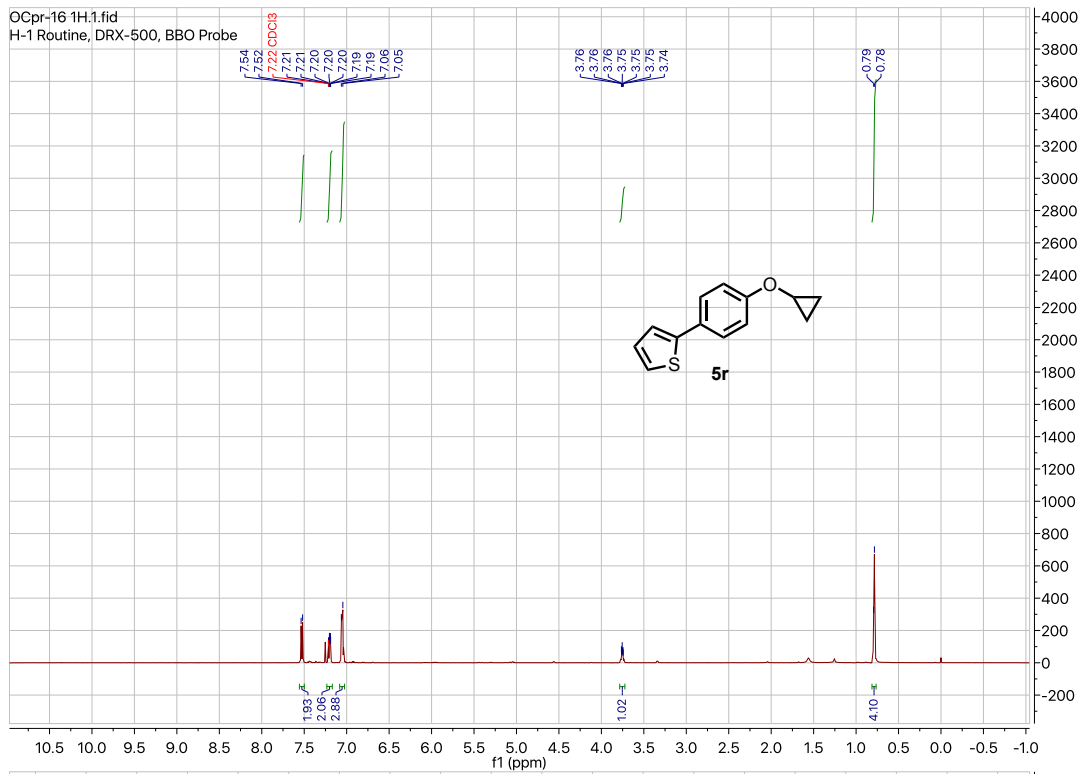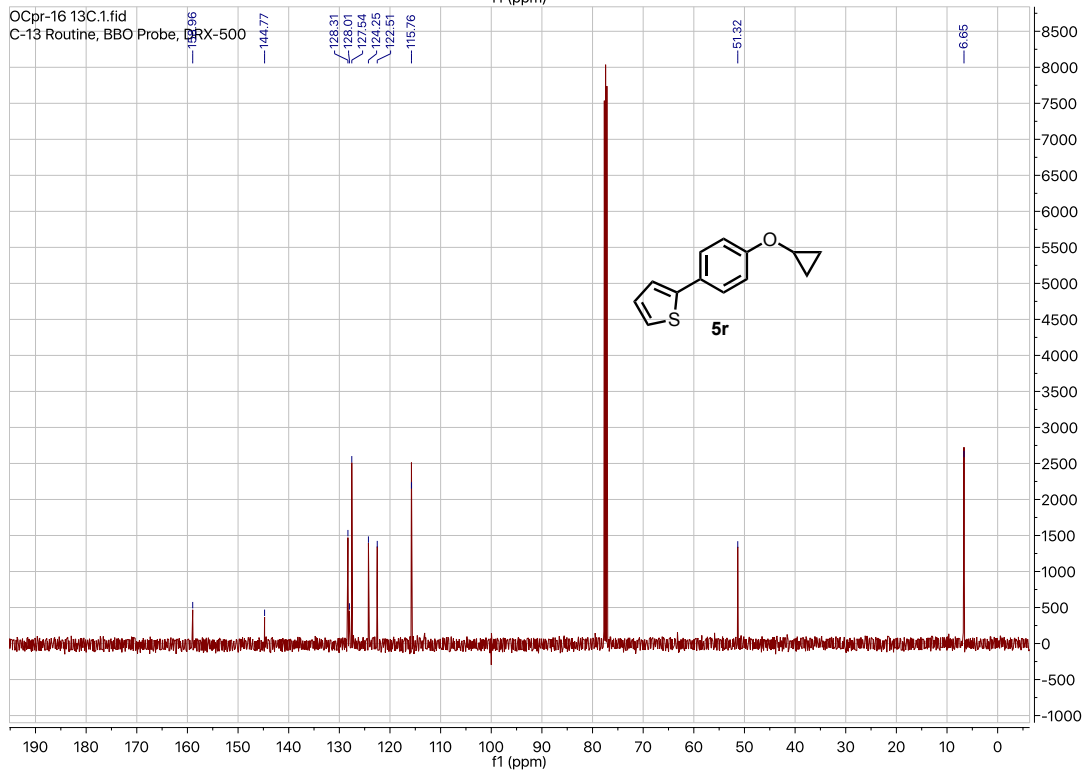

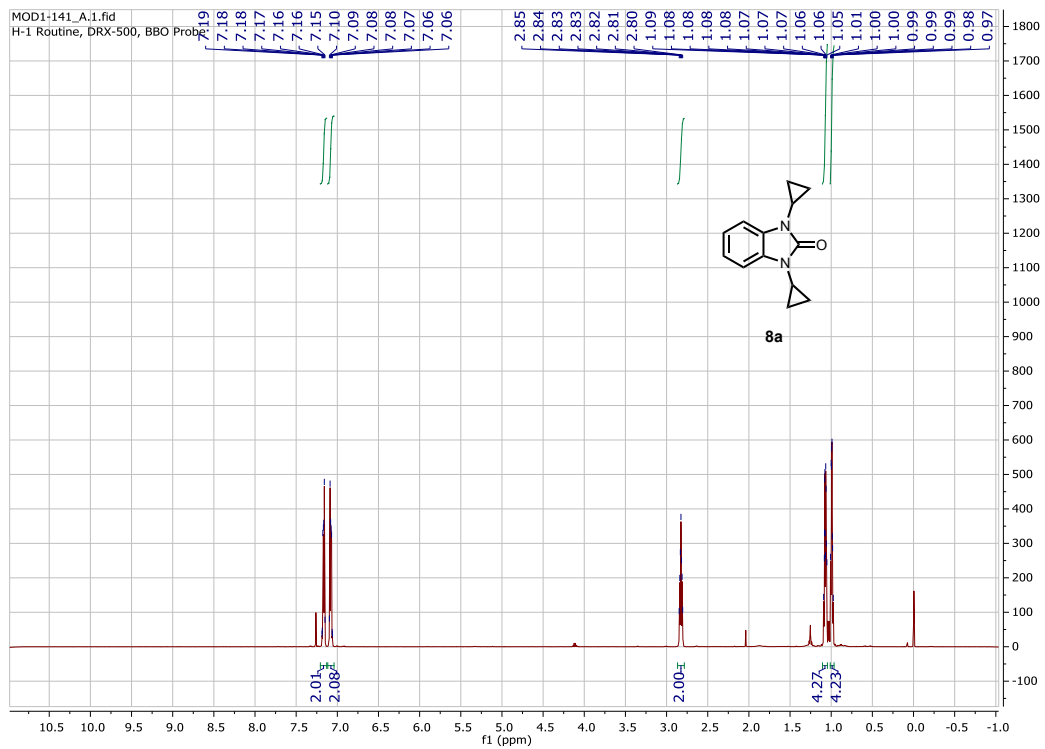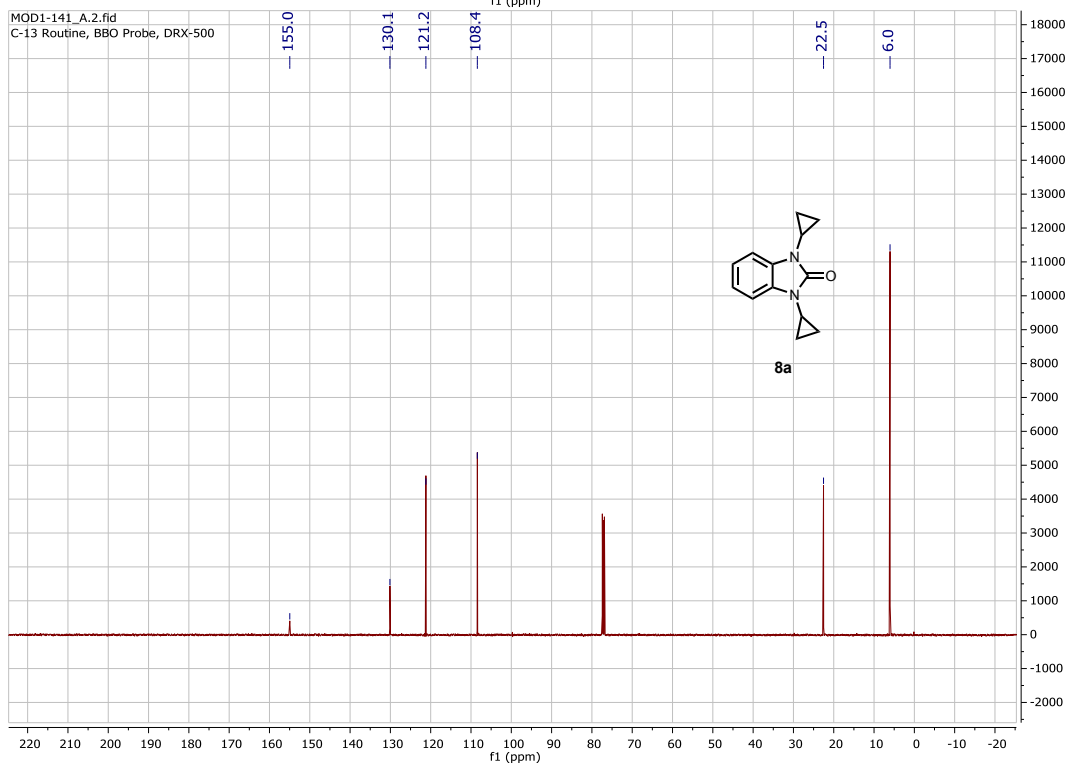

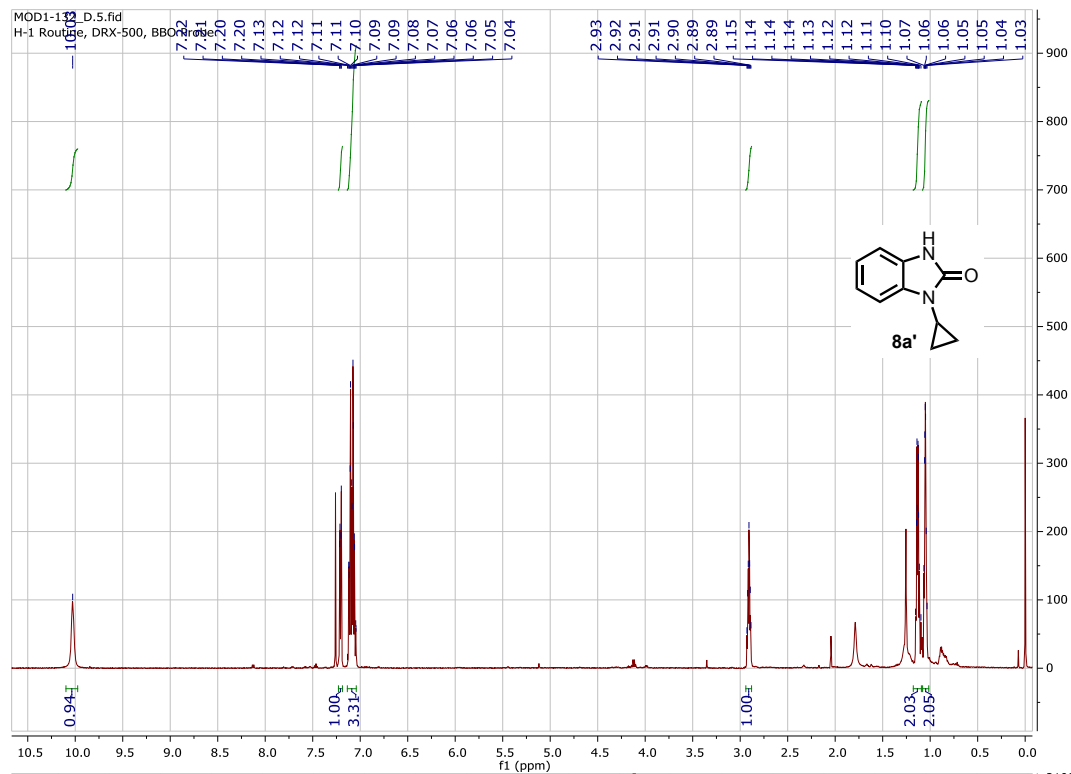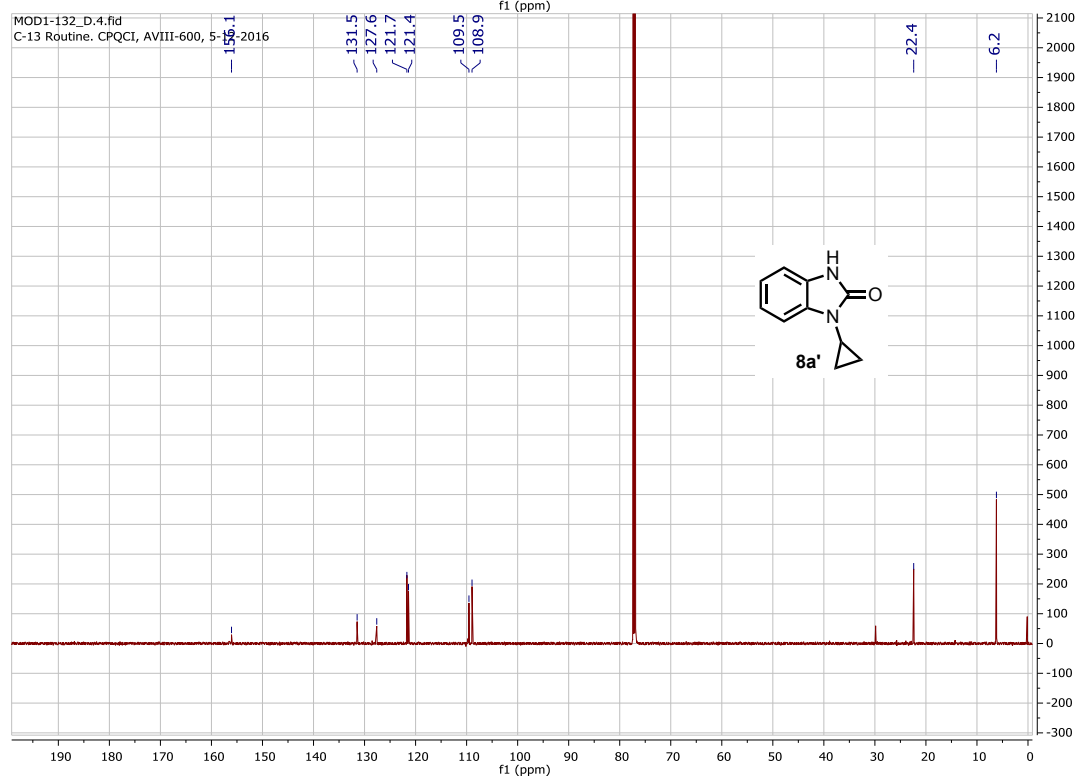

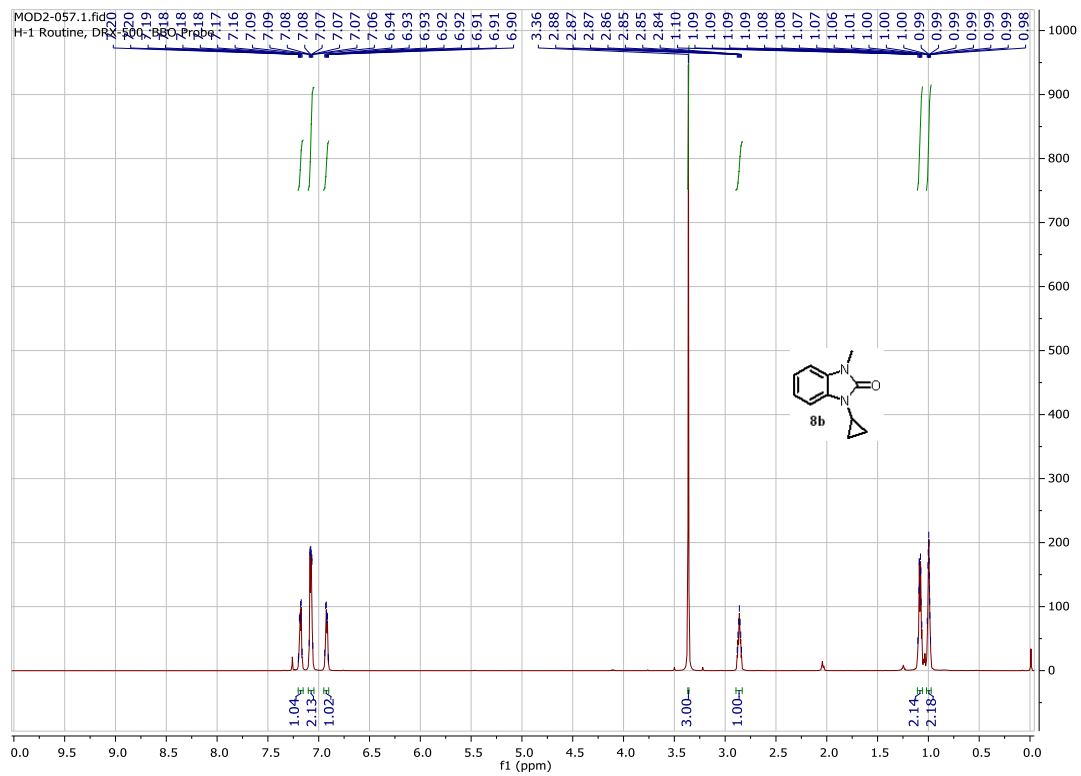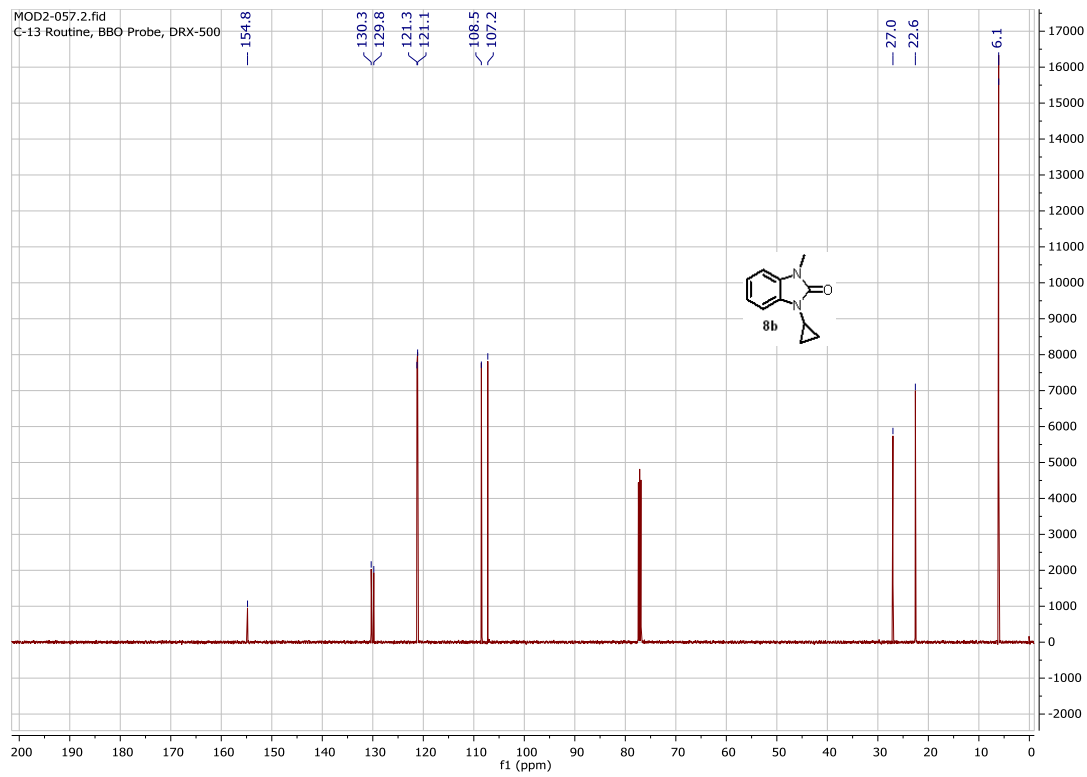

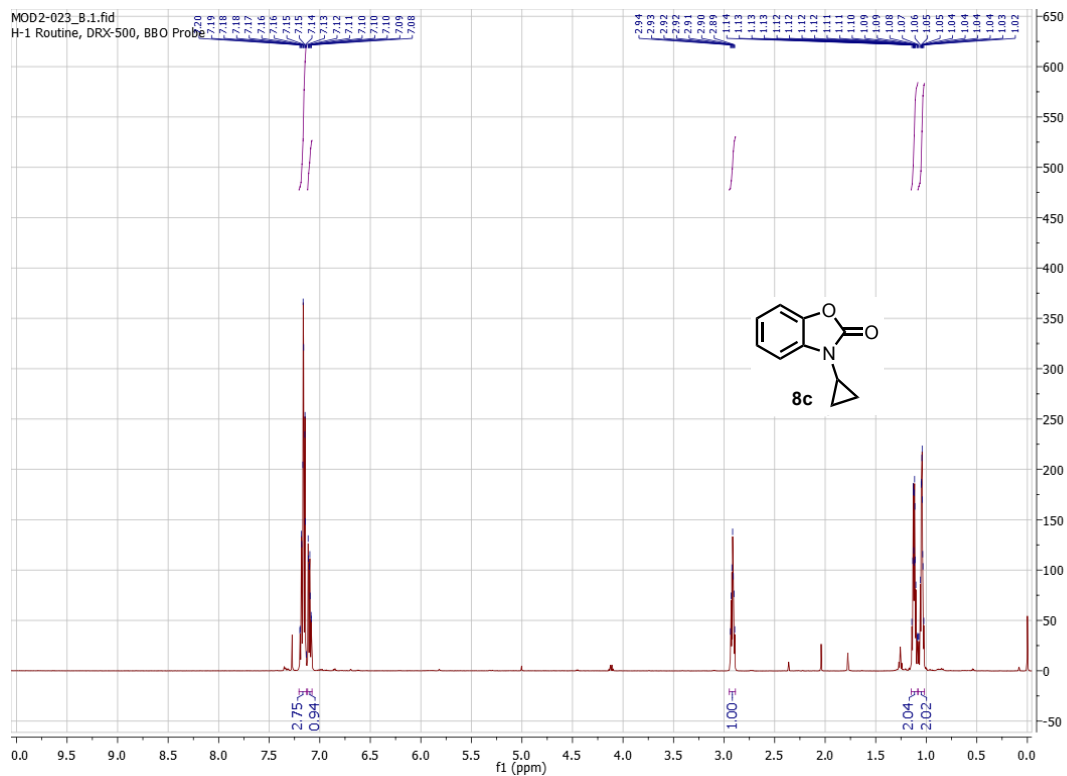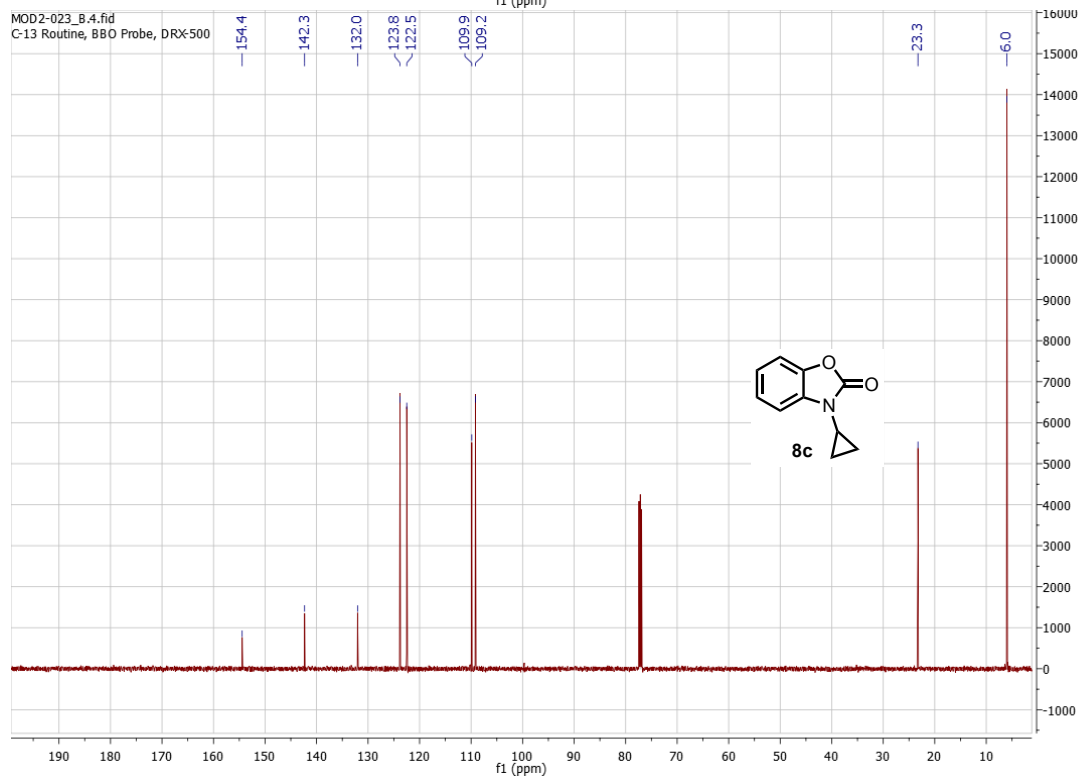

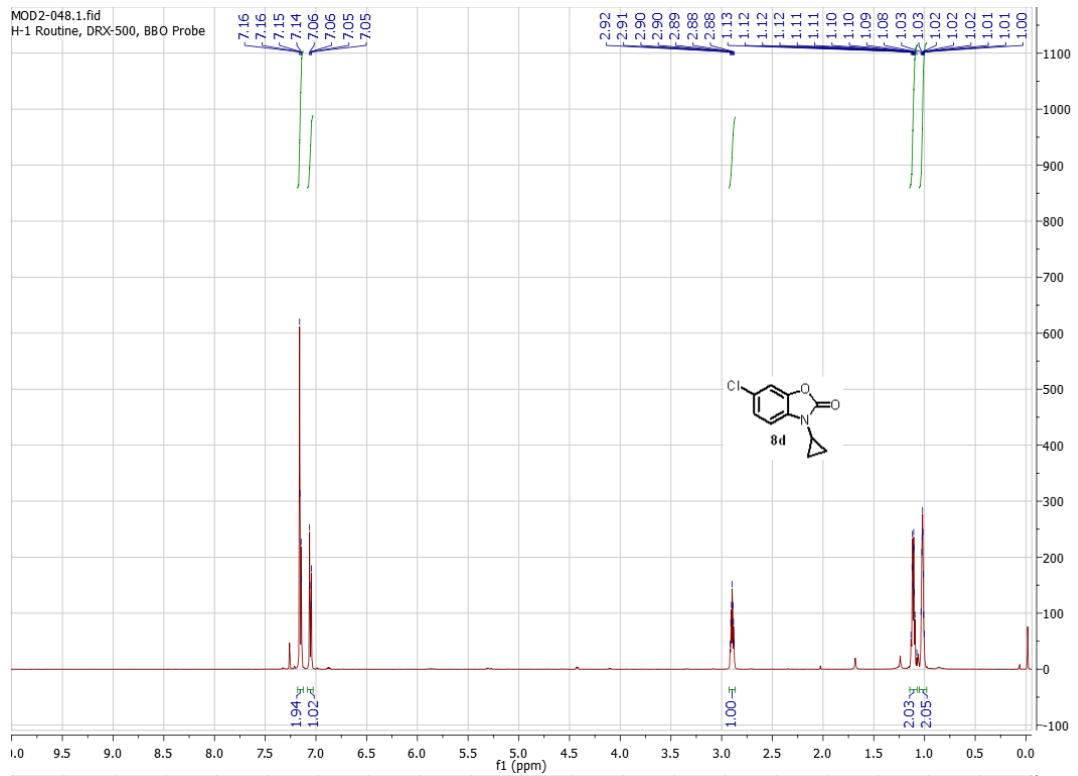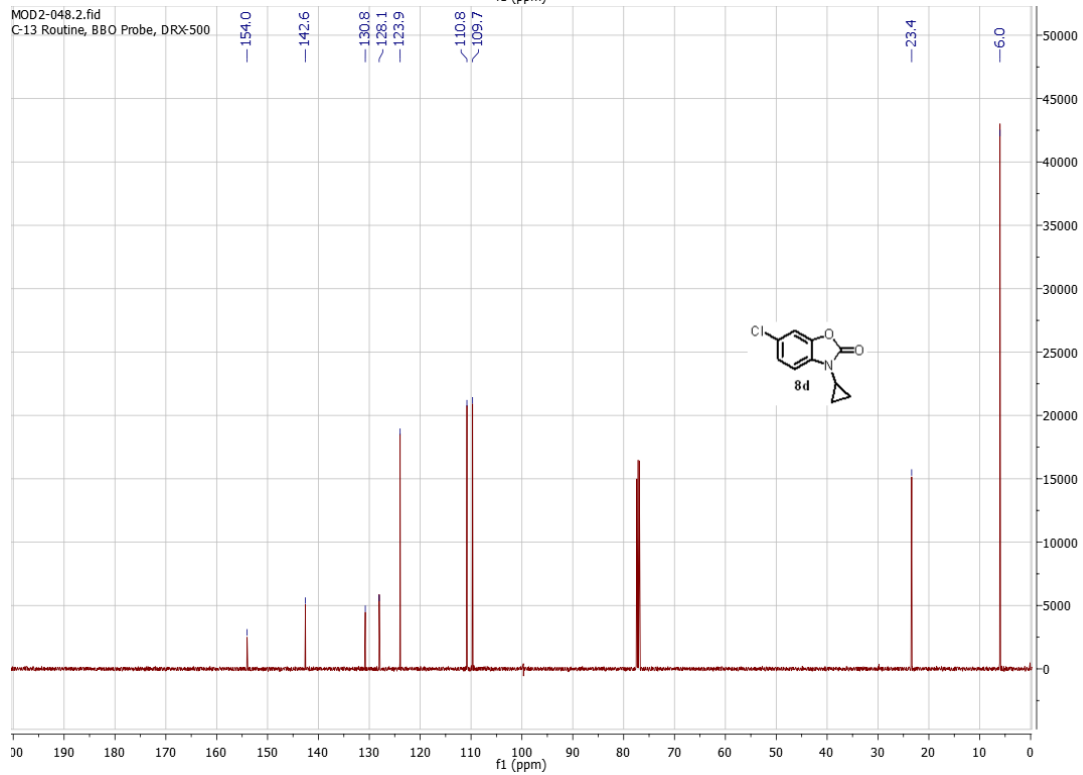



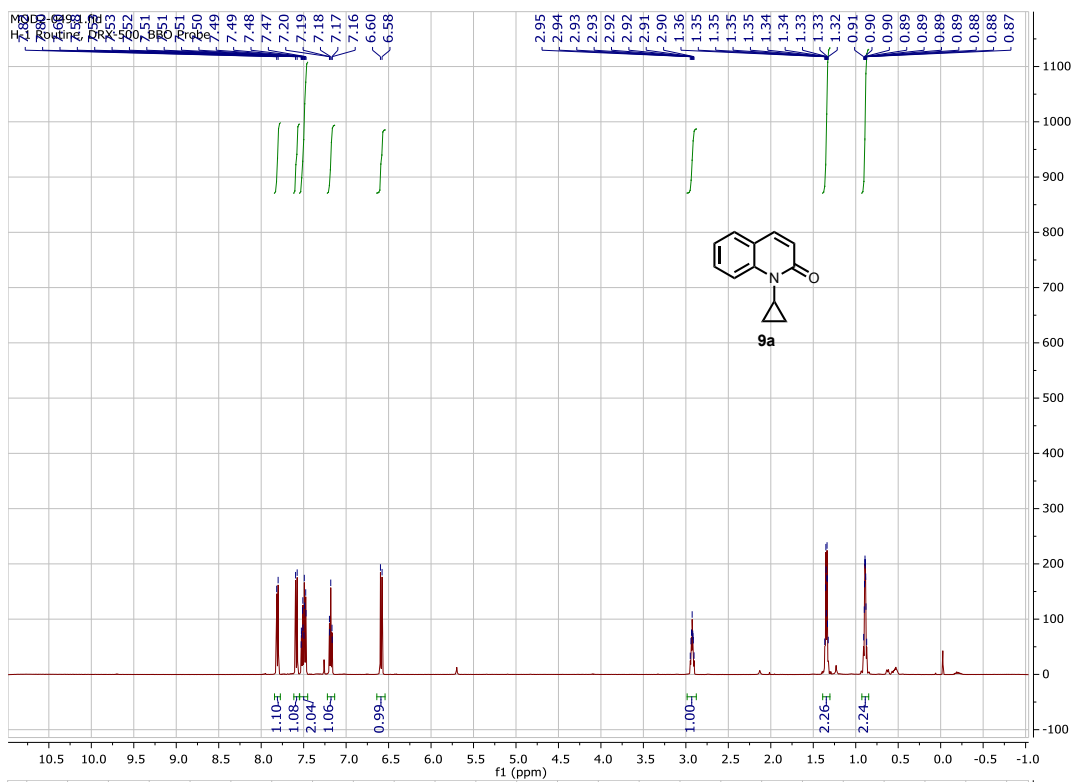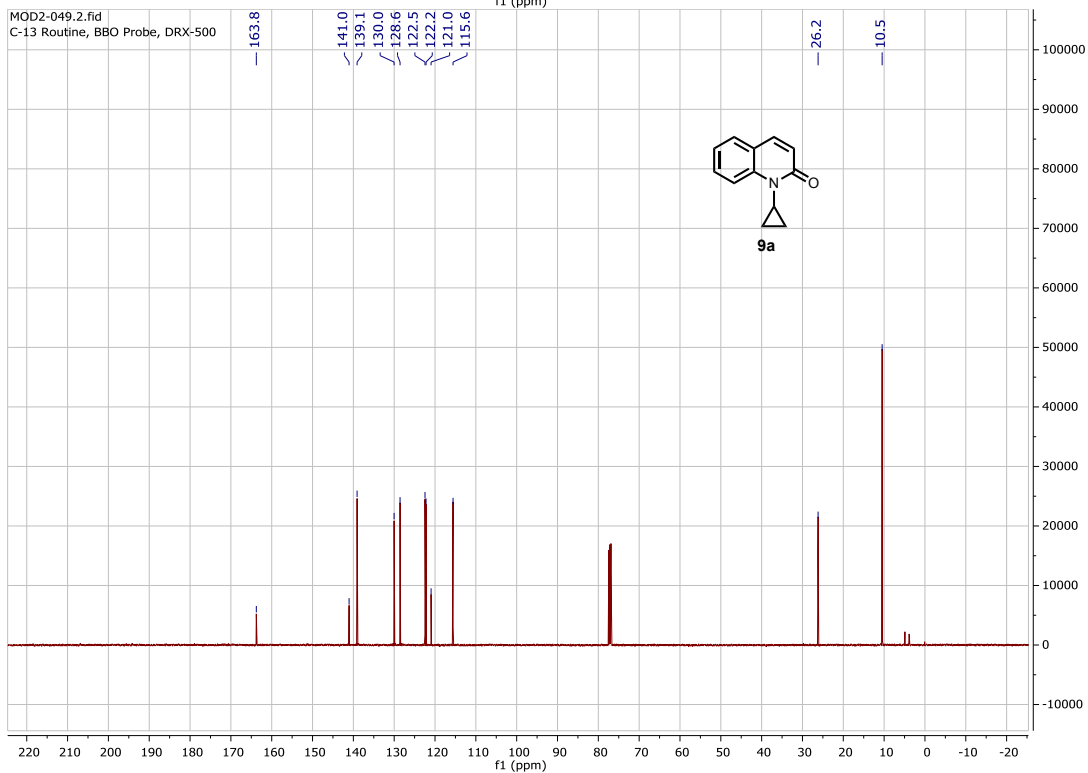

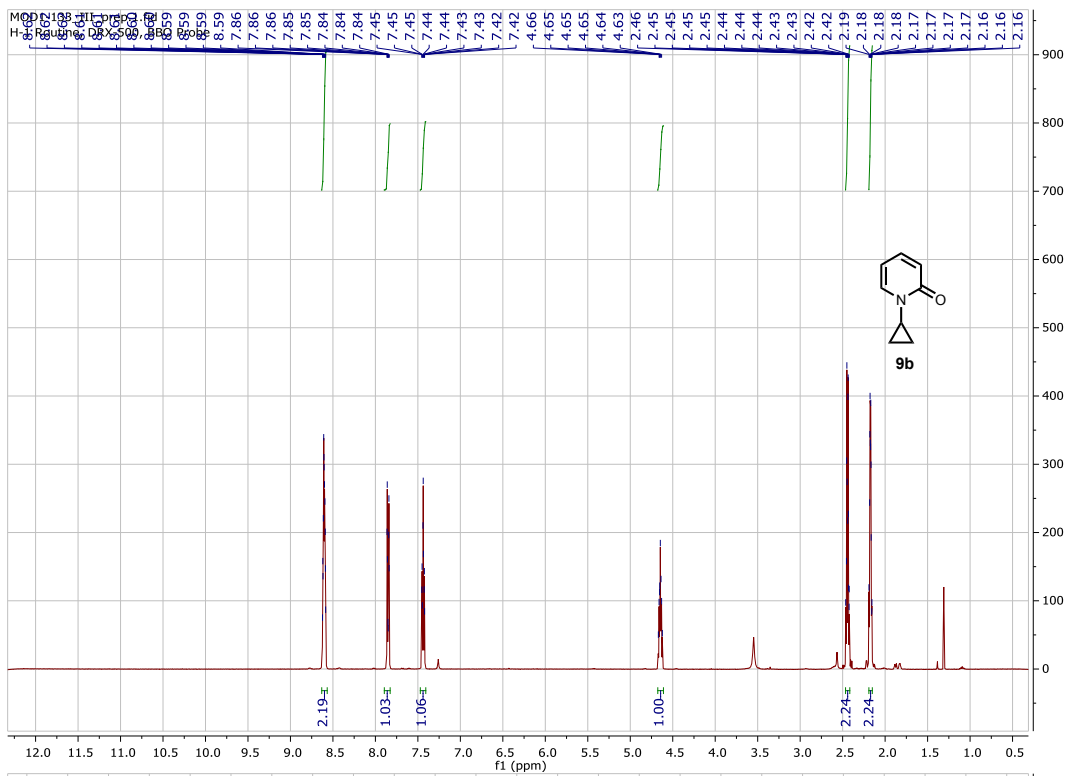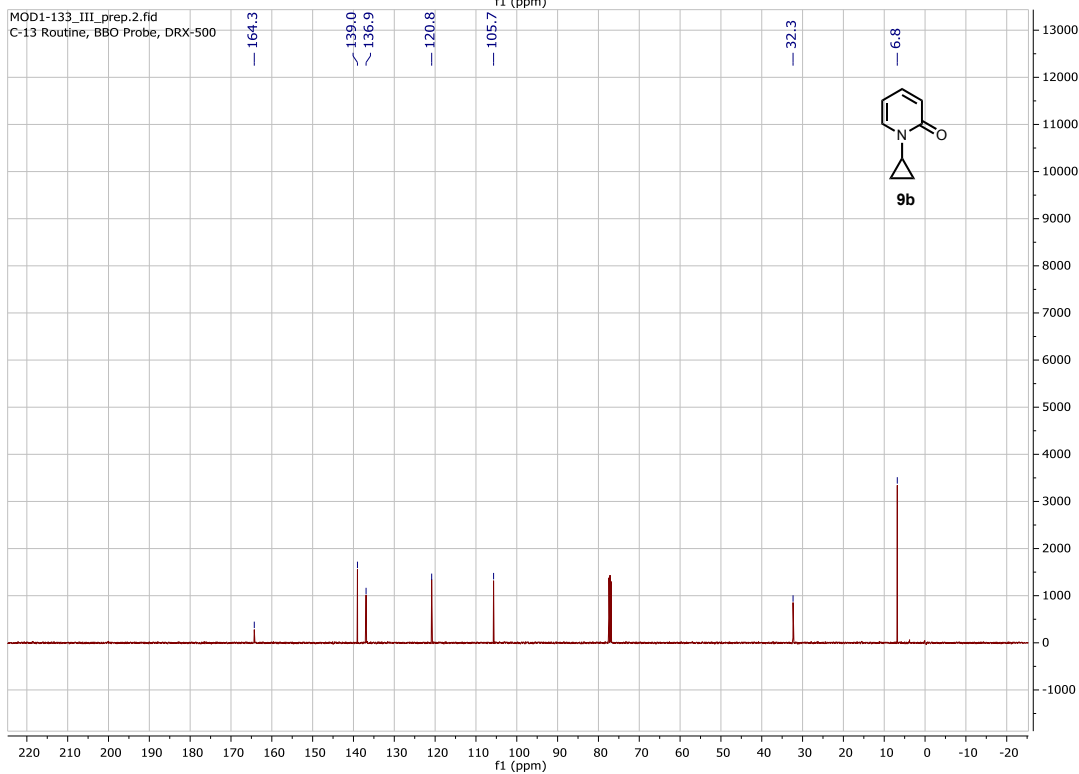

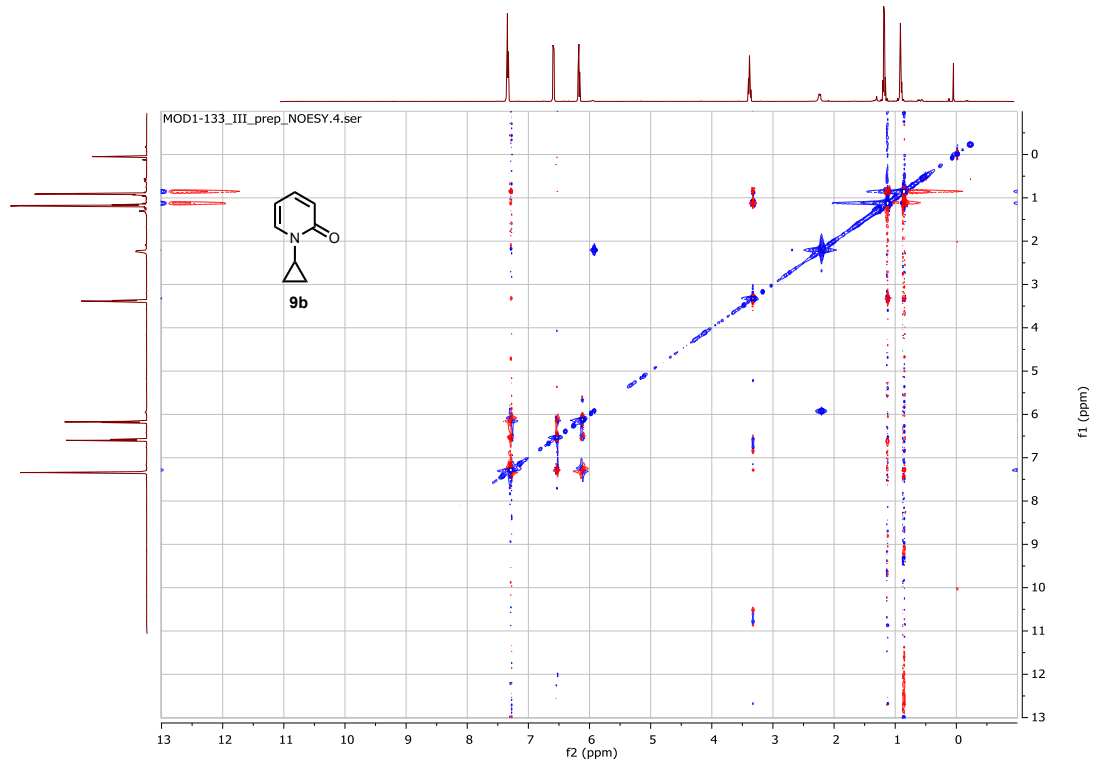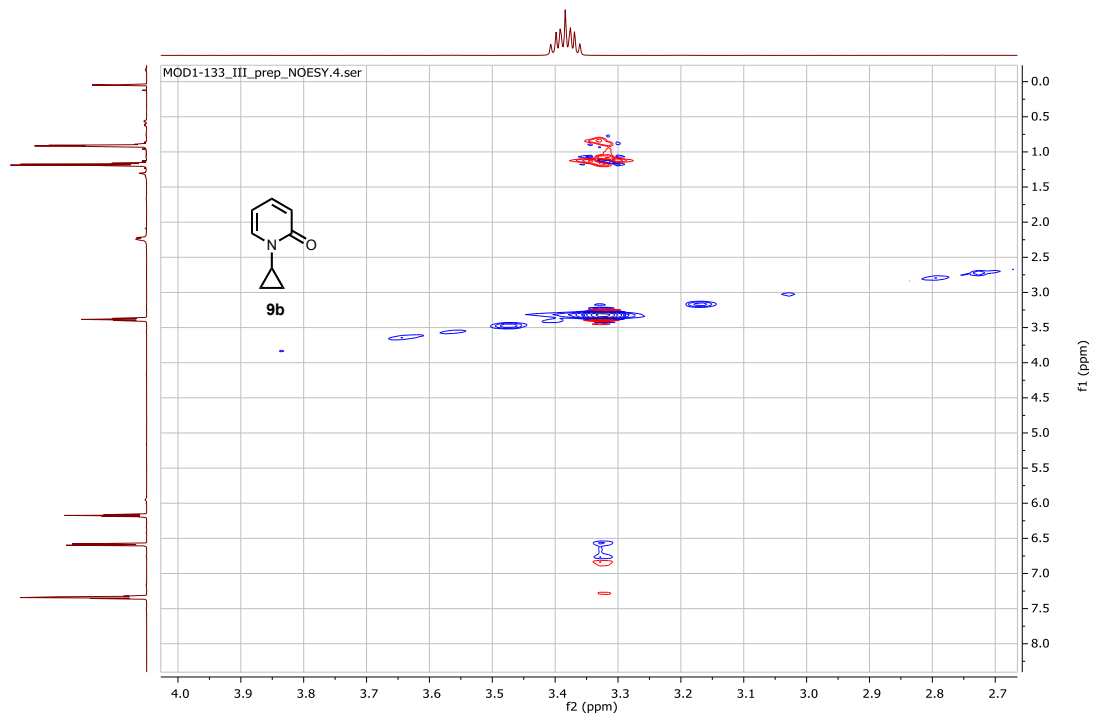

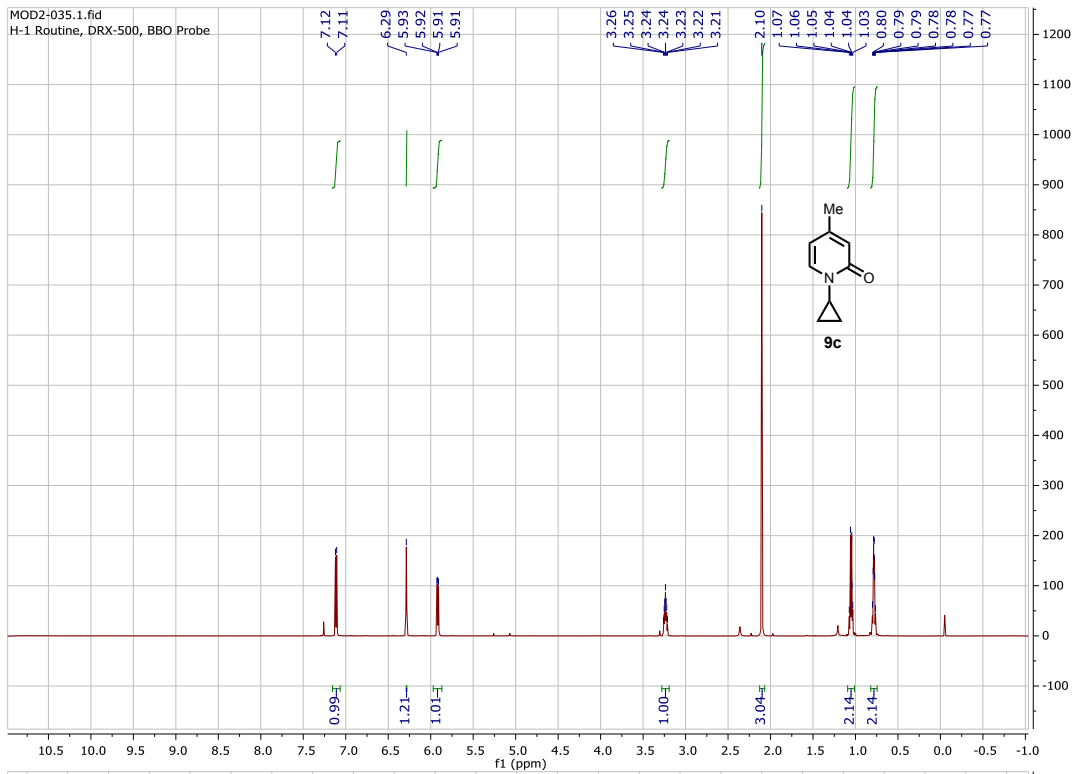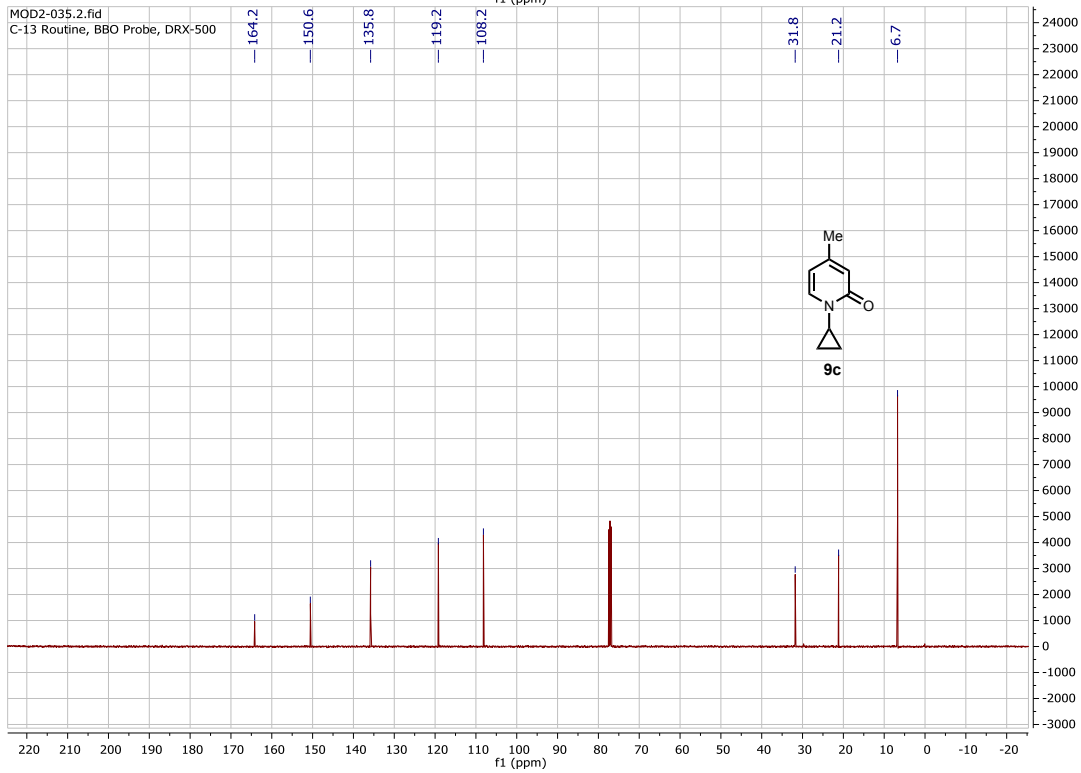

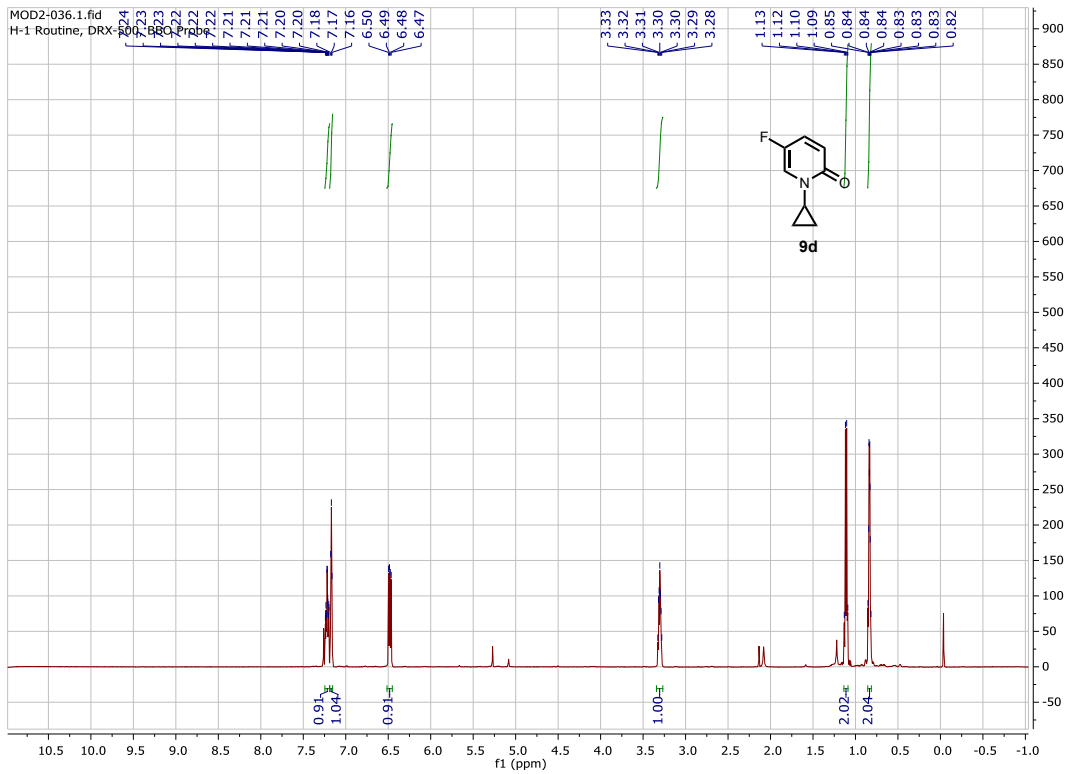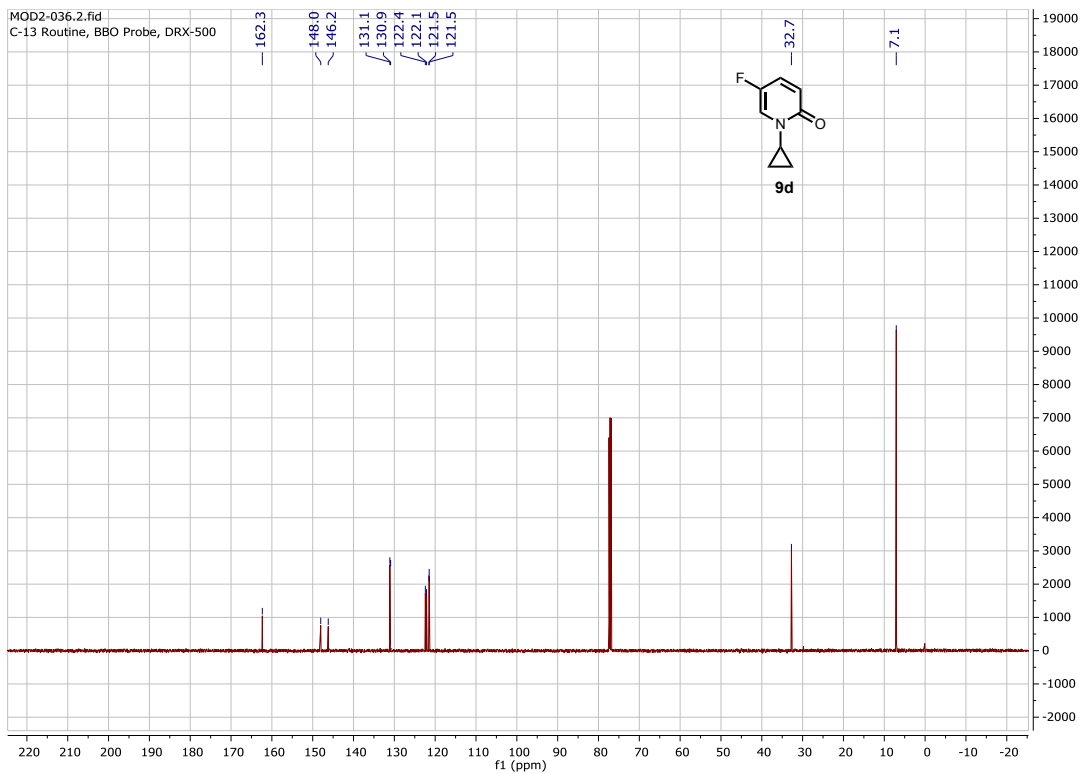

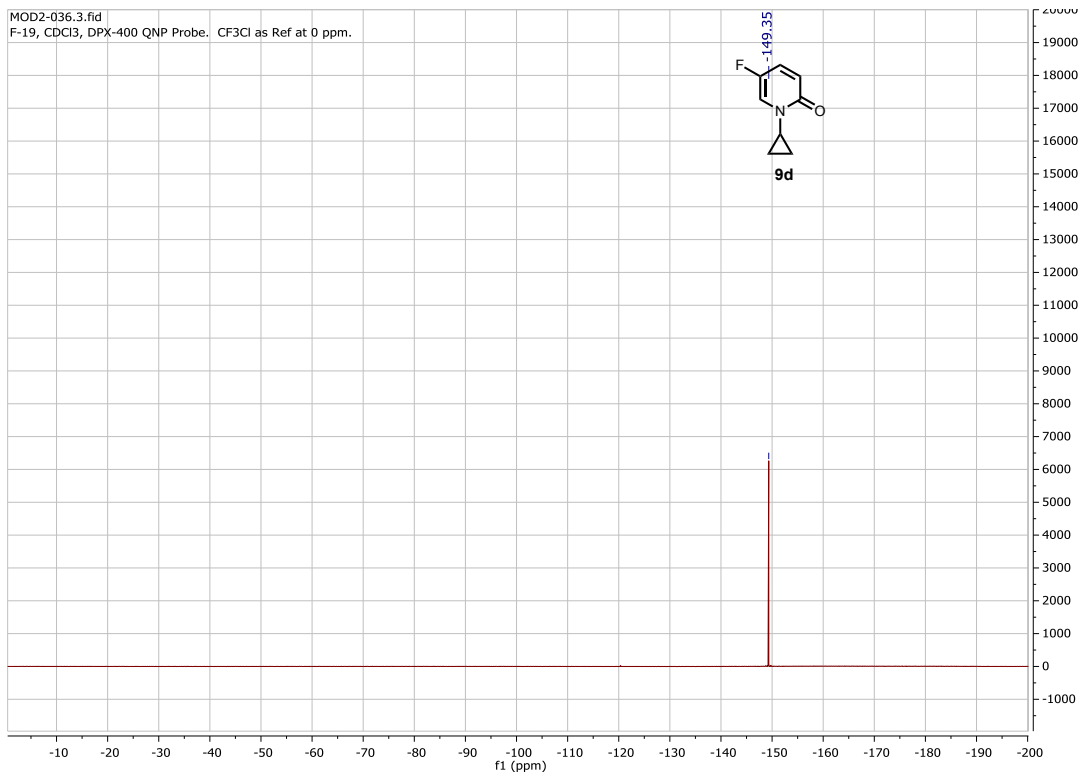

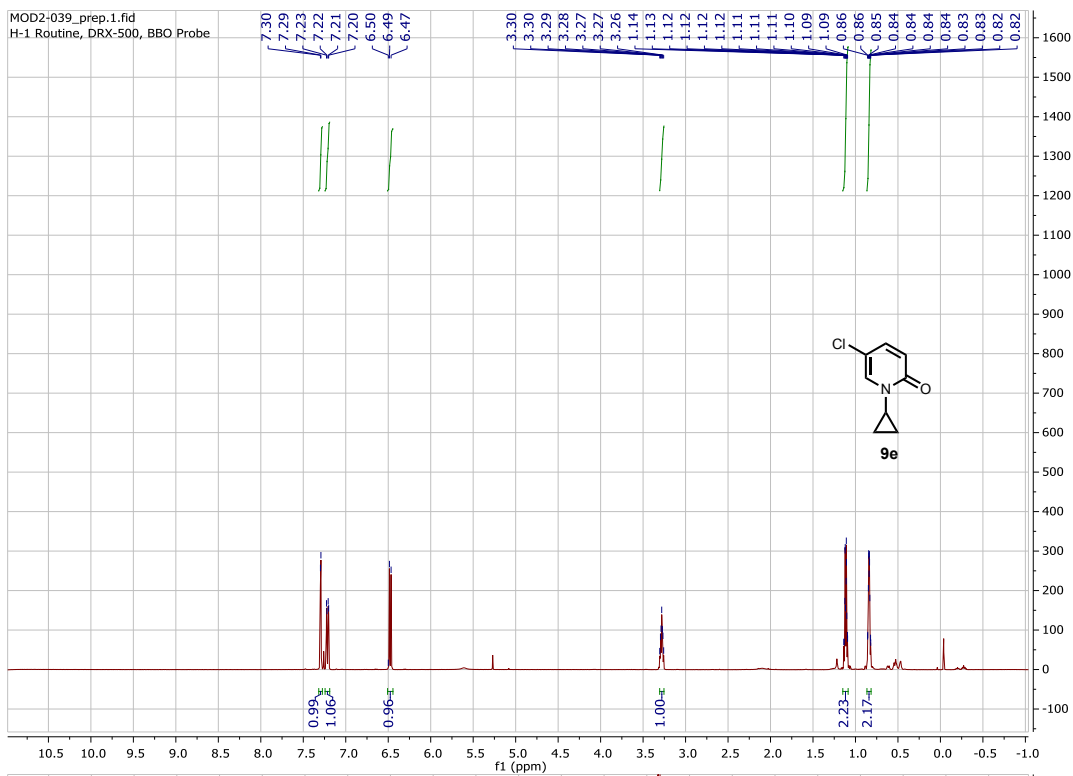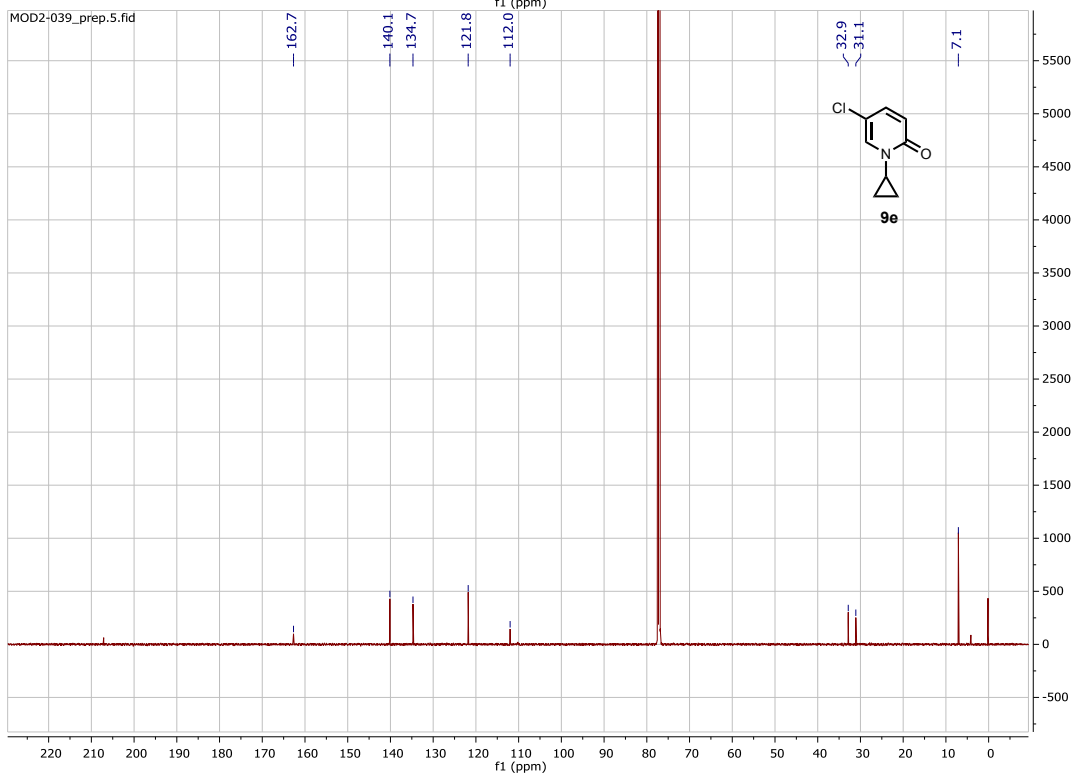

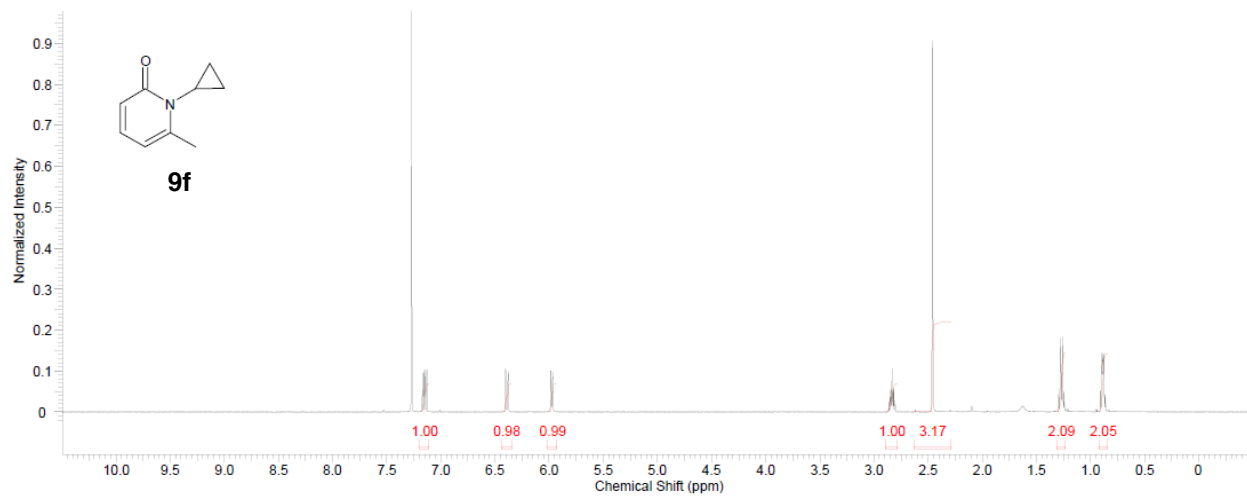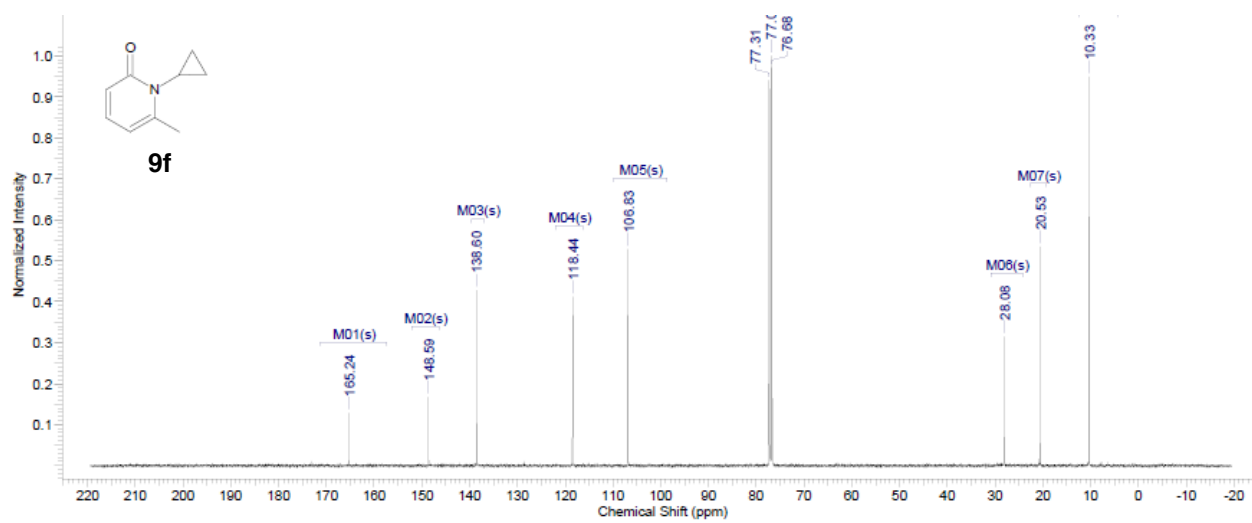



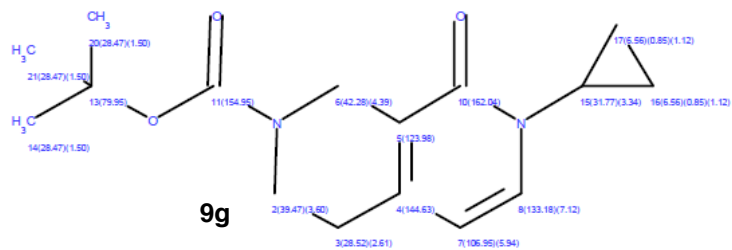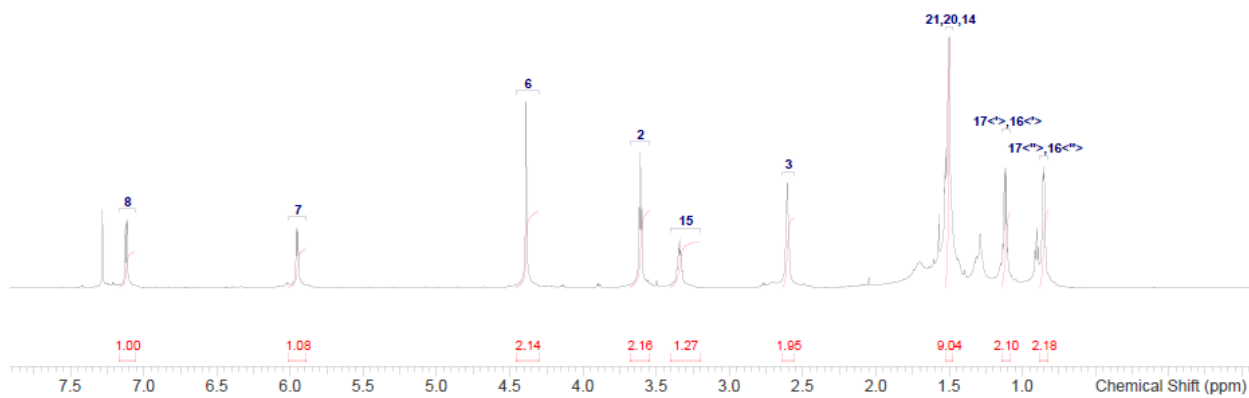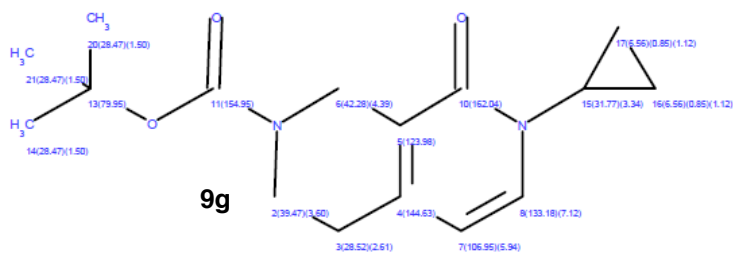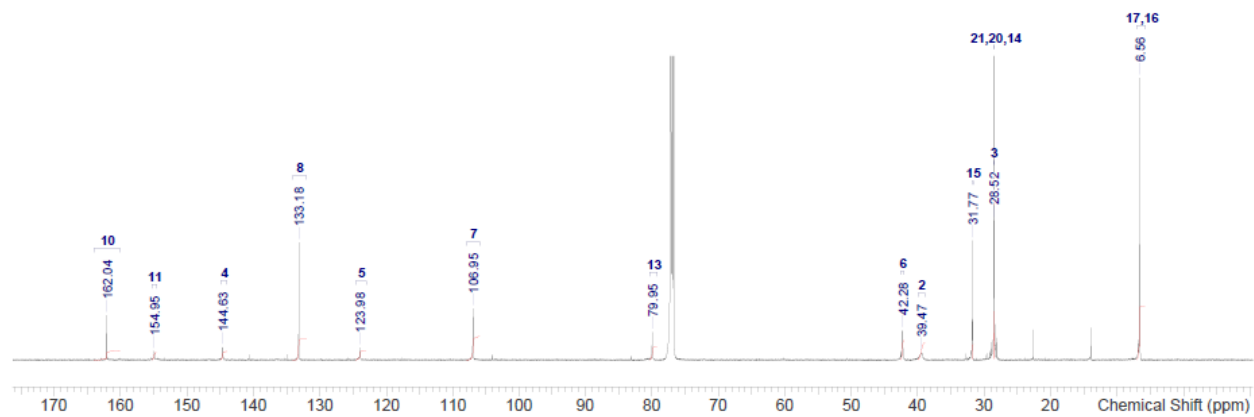

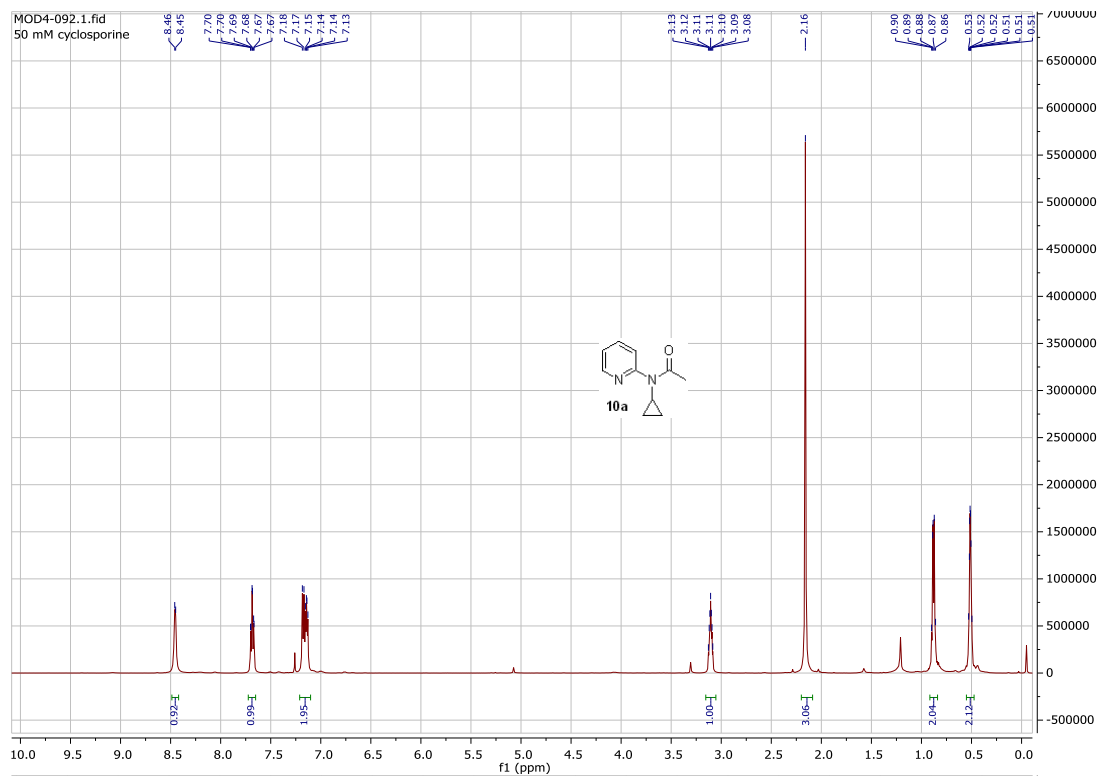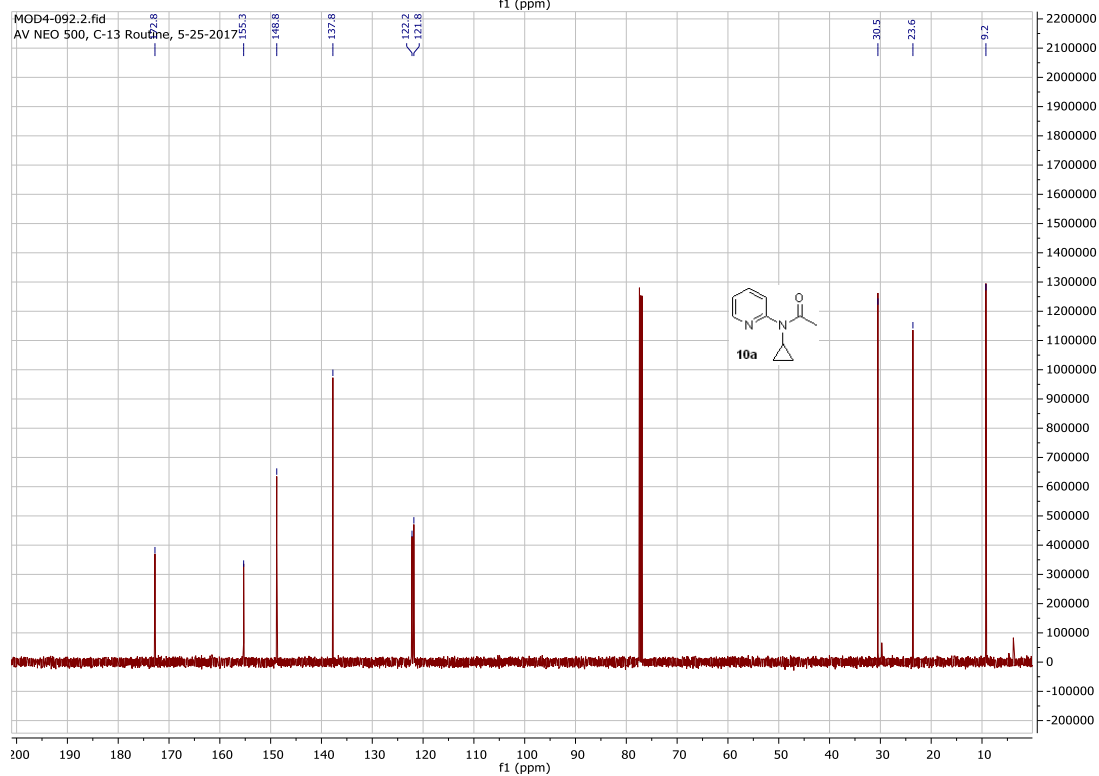

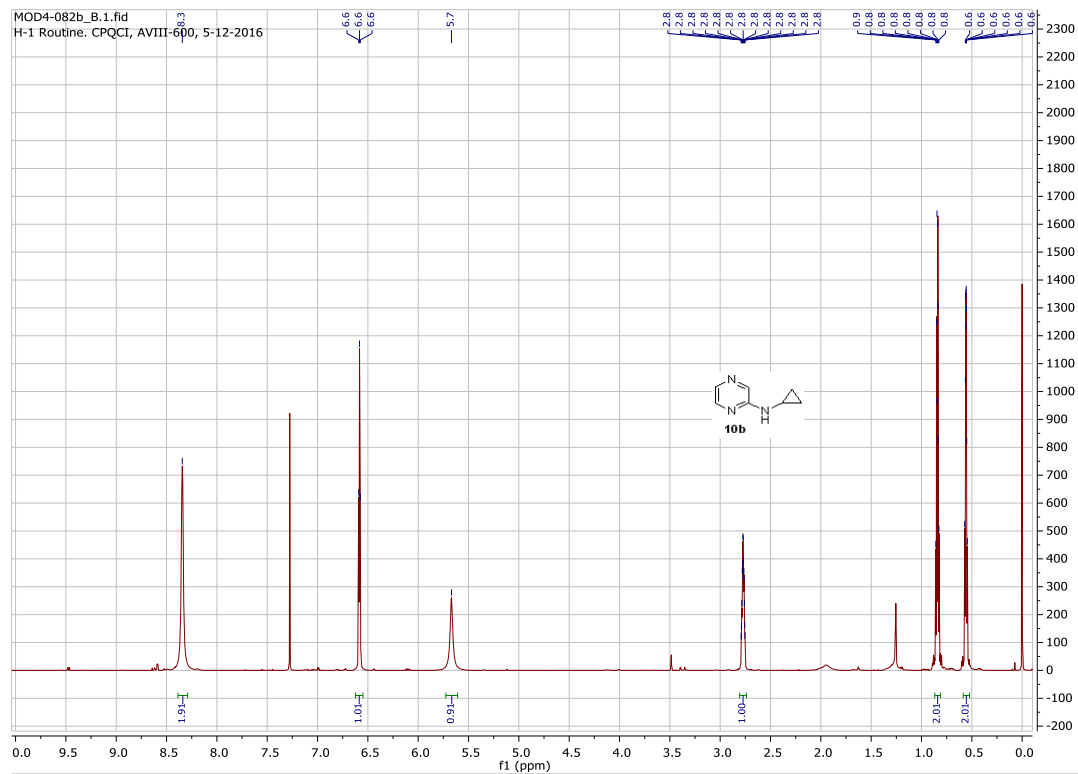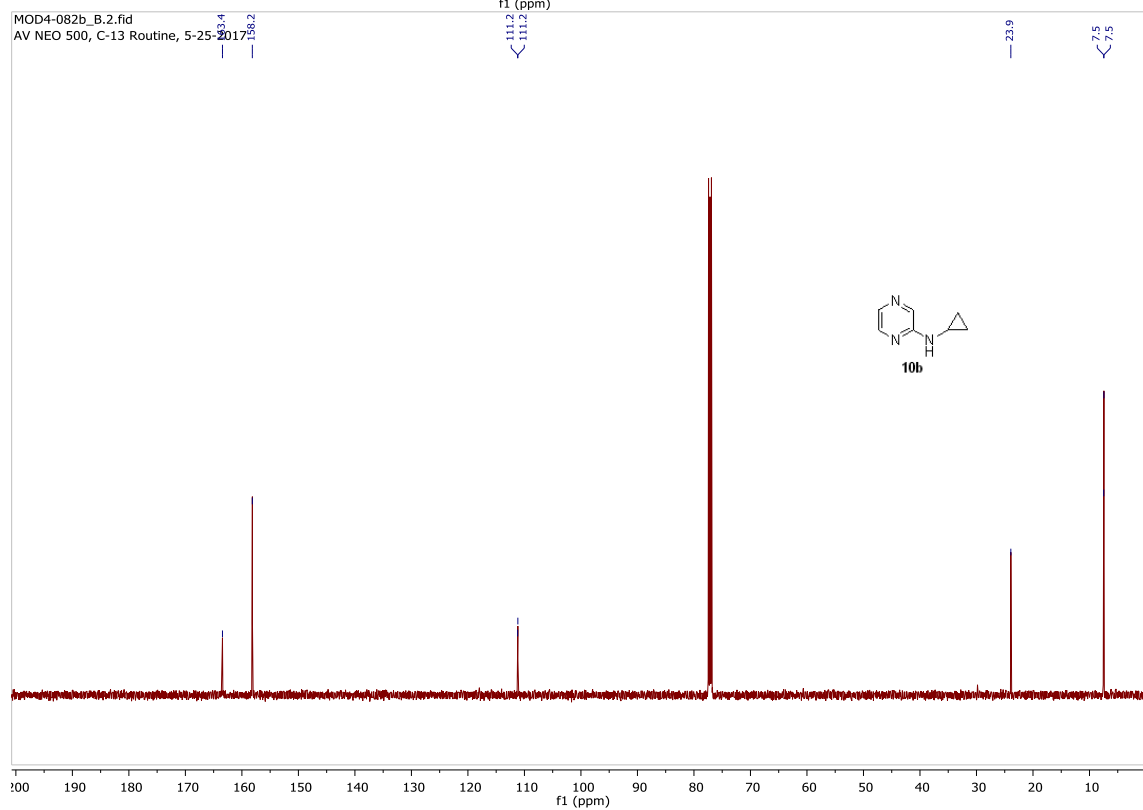

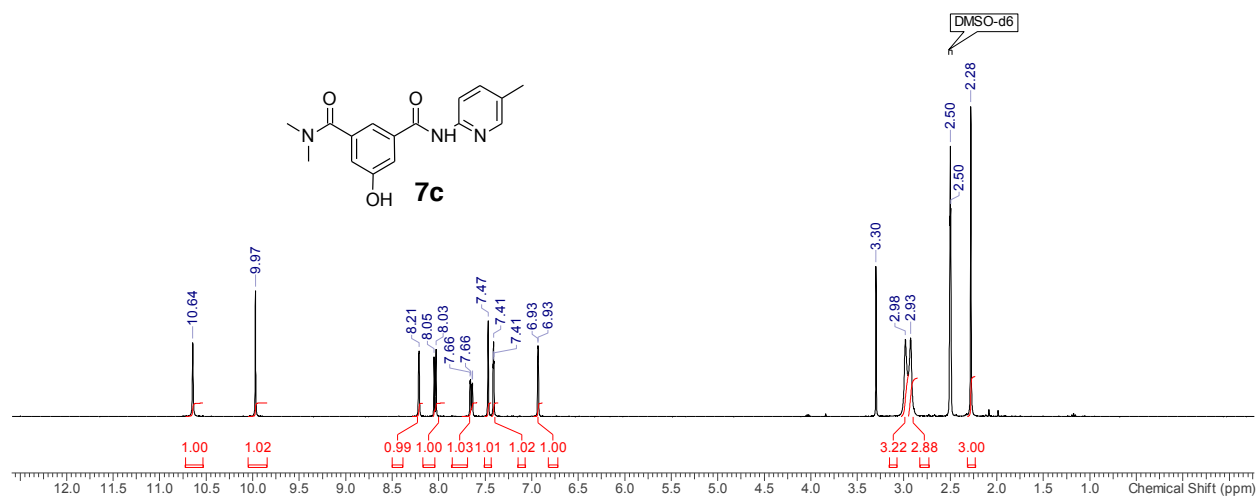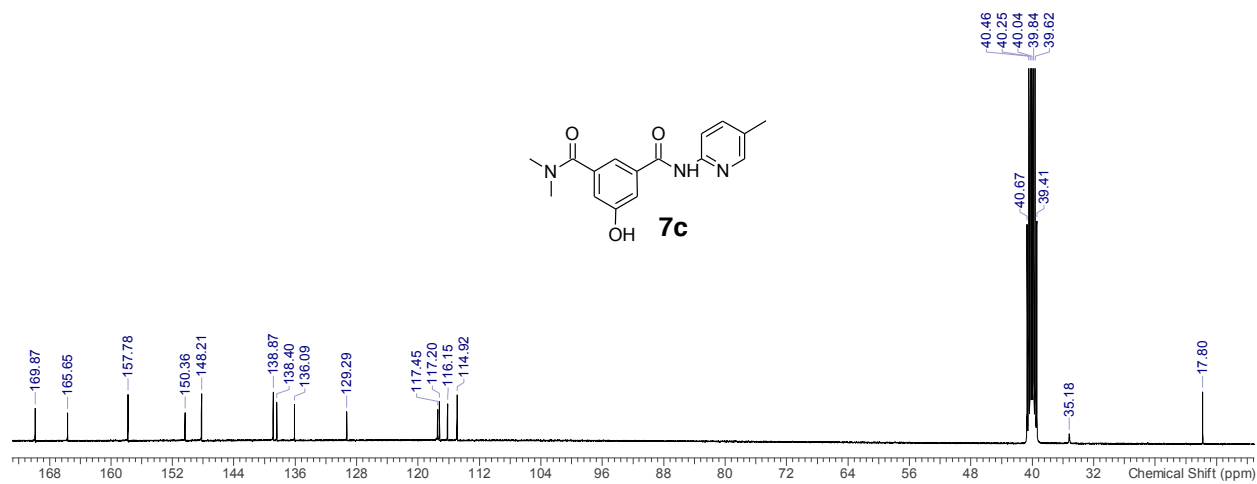

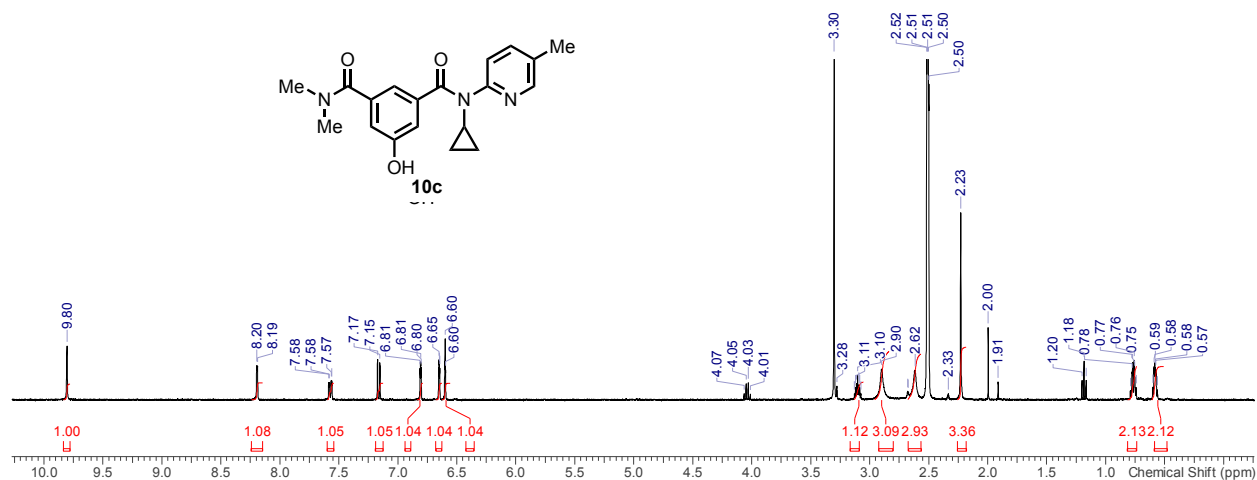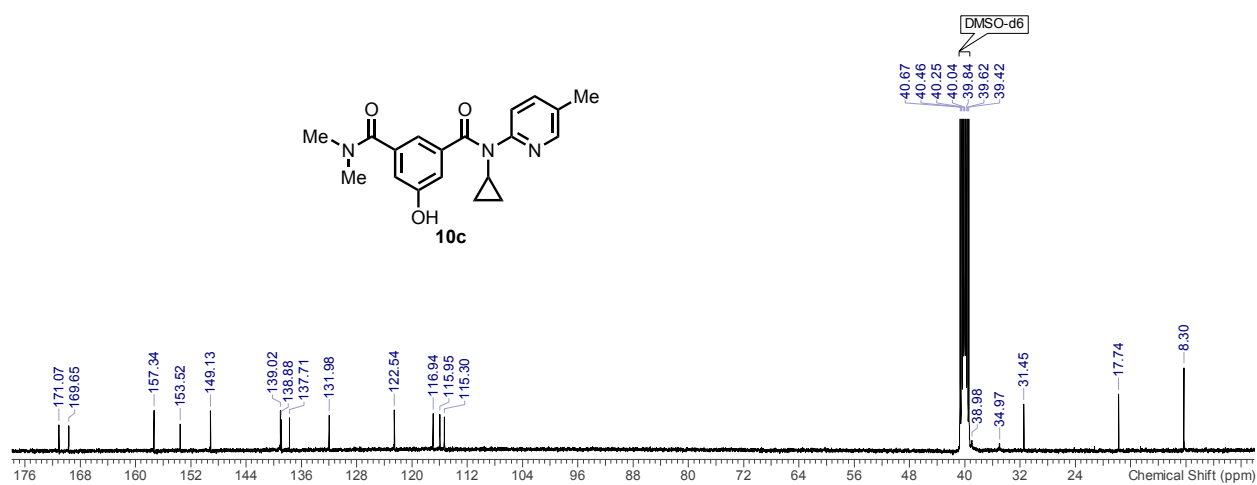

**<sup>1</sup>H-<sup>15</sup>N HMBC**

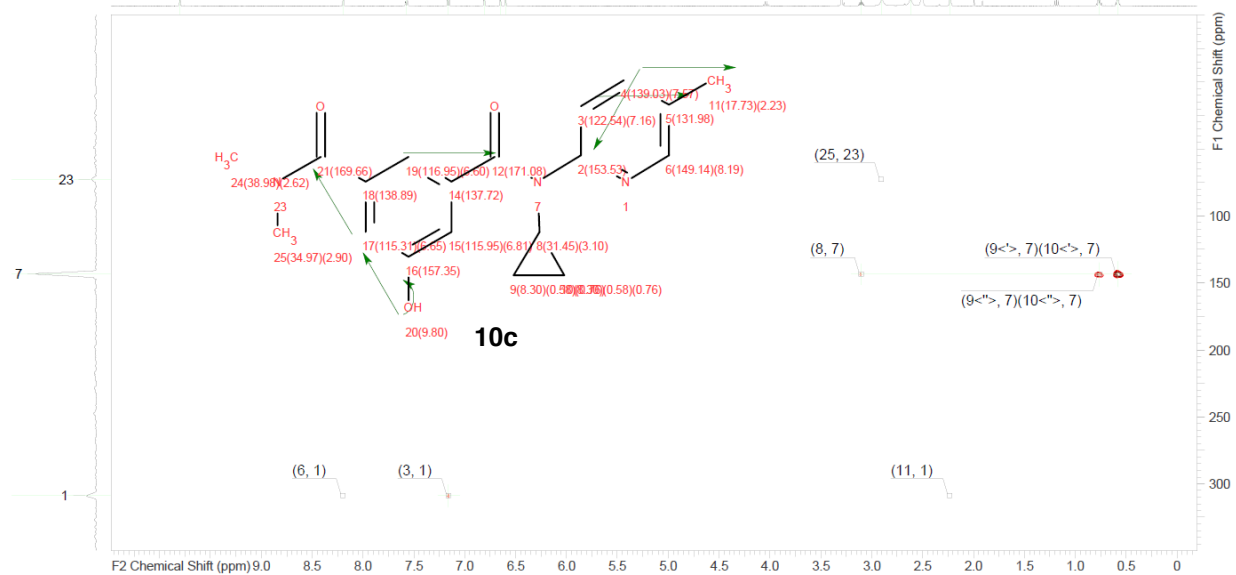

Supplement: NIHMS973461-supplement-SI.pdf [file NIHMS973461-supplement-SI.pdf]
